1

2

3 **Cryo-EM structures reveal how ATP and DNA binding in MutS**  
4 **coordinate the sequential steps of DNA mismatch repair**

5

6

7 Alessandro Borsellini<sup>1</sup>, Vladislav Kunetsky<sup>2</sup>, Peter Friedhoff<sup>2</sup>, Meindert H. Lamers<sup>1</sup>

8

9 <sup>1</sup>Department of Cell and Chemical Biology, Leiden University Medical Center, Leiden,  
10 The Netherlands. <sup>2</sup>Institute for Biochemistry, Justus-Liebig University, Giessen, Germany.

11

12 Correspondence should be addressed to [m.h.lamers@lumc.nl](mailto:m.h.lamers@lumc.nl)

13

## 14 **Abstract (186 of max 200)**

15 DNA mismatch repair detects and removes mismatches from DNA reducing the error rate  
16 of DNA replication a 100-1000 fold. The MutS protein is one of the key players that scans for  
17 mismatches and coordinates the repair cascade. During this, MutS undergoes multiple  
18 conformational changes that initiate the subsequent steps, in response to ATP binding,  
19 hydrolysis, and release. How ATP induces the different conformations in MutS is not well  
20 understood. Here we present four cryo-EM structures of *Escherichia coli* MutS at sequential  
21 stages of the ATP hydrolysis cycle. These structures reveal how ATP binding and hydrolysis  
22 induces a closing and opening of the MutS dimer, respectively. Additional biophysical analysis  
23 furthermore explains how DNA binding modulates the ATPase cycle by preventing hydrolysis  
24 during scanning and mismatch binding, while preventing ADP release in the sliding clamp  
25 state. Nucleotide release is achieved when MutS encounters single stranded DNA that is  
26 produced during the removal of the daughter strand. This way, the combination of the ATP  
27 binding and hydrolysis and its modulation by DNA enable MutS to adopt different  
28 conformations needed to coordinate the sequential steps of the mismatch repair cascade.

29

30

31

## 32 Introduction

33 DNA mismatch repair is an evolutionary conserved mechanism that removes mispaired  
34 bases from the DNA after DNA replication. Doing so, it reduces the mutation frequency a 100  
35 to a 1000-fold, preventing cancer and drug resistance. It also plays roles in regulation of  
36 recombination, triplet repeat expansion and DNA damage signalling <sup>1,2</sup>. The repair process  
37 consists of a cascade of proteins that act sequentially. The MutS protein scans the DNA for  
38 mismatches, and upon recognition recruits a second protein MutL. In *Escherichia coli* (*E. coli*),  
39 MutL subsequently activates the endonuclease MutH that creates a nick in the newly  
40 synthesized strand on hemi-methylated GATC sites <sup>3-5</sup>. In other species, including eukaryotes,  
41 the endonuclease activity resides in the MutL homologs themselves <sup>6,7</sup> and is directed to the  
42 newly synthesized strand by the DNA sliding clamp ( $\beta$  or PCNA) <sup>8,9</sup>. In bacteria, the single  
43 stranded nick then forms the entry point for the UvrD helicase, or RecD2 in some *Bacillus*  
44 species <sup>10,11</sup>, that with the aid of a 5'-3' or 3'-5' exonuclease will excise the newly synthesized  
45 strand <sup>12,13</sup>. The removed stretch of DNA will then be resynthesized by a DNA polymerase and  
46 the remaining nick sealed by a DNA ligase <sup>14</sup>. In the eukaryotic system the strand removal  
47 process is less well understood but involves the replicative DNA polymerase  $\delta$  and exonuclease  
48 EXO1 <sup>15</sup>.

49 Throughout this process, MutS is the master coordinator that initiates the subsequent steps  
50 of the repair cascade. First, it scans the genome in search for a mismatch. Once it is bound to a  
51 mismatch it undergoes a conformational change into a sliding clamp that recruits the second  
52 protein MutL <sup>16,17</sup>. In the clamp state, MutS remains on the DNA for prolonged times and only  
53 releases the DNA when it encounters a DNA ends <sup>18,19</sup> or a ssDNA gap <sup>20,21</sup>. This way, MutS  
54 molecules will remain present on the DNA until the mismatch has been removed and the repair  
55 process is terminated. Recently we have determined multiple cryo-EM structures of MutS on  
56 DNA at different stages of the repair process, revealing the multiple conformations that enable

57 it to perform its different tasks <sup>22</sup>. ATP binding and hydrolysis are essential for MutS to switch  
58 between the different states <sup>23</sup>, but the molecular basis of these transitions and how they are  
59 regulated remains unresolved. To gain insight into the ATP-induced conformational changes  
60 in MutS we determined four structures of apo MutS at sequential stages of the ATP hydrolysis  
61 cycle: ADP-bound, ATP-bound, bound to a non-hydrolysable ATP analogue AMPPNP and  
62 bound to the transition state analogue ADP-vanadate <sup>24</sup> (ADP-VO<sub>4</sub><sup>3-</sup> / ADP-Vi). These  
63 structures show how an open MutS dimer in the ADP-bound form closes upon binding to a  
64 single ATP but does not reach a hydrolysis competent active site in this structure. Only upon  
65 binding of two triphosphate nucleotides the complete active site is formed that can hydrolyse  
66 ATP.

67 Additional biochemical analysis combined with the recently determined structures of DNA-  
68 bound MutS, explains how ATP and DNA binding work together to initiate the subsequent  
69 steps of the repair cascade. During both the scanning of the DNA as well as mismatch binding,  
70 the DNA keeps the ATPase domains in an open, non-catalytic state where the nucleotide  
71 binding sites are free to exchange ADP for ATP. Two ATP molecules are needed to transform  
72 MutS into the sliding clamp conformation that recruits MutL. In this clamp state, the ATPase  
73 active sites are completed and can hydrolyse ATP. However, the dsDNA itself keeps the  
74 nucleotide binding sites closed and prevents nucleotide release until MutS reaches a stretch of  
75 ssDNA where the interactions with the dsDNA are lost. This enables the dimer to open up and  
76 reset the ATPase site for a new round of ATP and DNA binding.

77

## 78 **Results**

### 79 **Structures apo MutS at sequential stages of the ATP hydrolysis cycle**

80 In order to gain insight into the mechanism of ATP hydrolysis in MutS, we determined four  
81 cryo-EM structures of the MutS dimer in absence of DNA at sequential stages of the hydrolysis  
82 cycle: 1) bound to two ADP molecules, 2) bound to one ADP and one ATP, 3) bound to two  
83 AMPPNP molecules, a non-hydrolysable ATP analogue, and 4) bound to two ADP-vanadate  
84 (ADP-V<sub>i</sub>) molecules, a transition state analogue (Fig. 1, Table 1, and Extended Data Figs. 1-  
85 4). The four structures were determined to a resolution of 4.8, 3.3, 3.4, and 3.7 Å, respectively.  
86 All structures were obtained by incubating 4 μM MutS with 3 mM of the nucleotide for 5 min  
87 at 4 °C in buffer containing Mg<sup>2+</sup> before plunge freezing in liquid ethane. In the resulting cryo-  
88 EM data, we find that three of the four conditions show a single conformational state: an open  
89 form for ADP<sub>2</sub> and a closed form for both AMPPNP<sub>2</sub> and ADP-V<sub>i2</sub>. In contrast, in the sample  
90 incubated with ATP we observe both the open ADP<sub>2</sub>-bound form and the closed ATP:ADP-  
91 bound form indicating that under these conditions MutS can hydrolyse ATP.

92 In all four structures, the clamp domains are poorly resolved, indicating that in the absence  
93 of DNA these domains are flexible. The flexibility is most pronounced in the structure of ADP-  
94 bound MutS, where the lever and clamp domains adopt different conformations that can be  
95 discerned by negative stain electron microscopy (Fig 1i). The four structures show an  
96 increasing compaction going from the open form in the ADP<sub>2</sub>-bound state, to ATP:ADP-bound  
97 state, to the most compact form in the AMPPNP<sub>2</sub> and ADP-V<sub>i2</sub>-bound state that both adopt an  
98 identical conformation. The transition from the ADP<sub>2</sub>-bound to ATP:ADP-bound is  
99 characterized by a 35° rotation of the two monomers towards each other around a pivot point  
100 located at the interface of the two ATPase domains (Fig. 1j-k, Supplementary Video 1). It is  
101 noteworthy that the addition of a single PO<sub>4</sub><sup>3-</sup> ion (from ADP to ATP) results in a dramatic  
102 increase in resolution, from 4.8 to 3.3 Å, due to the more stable conformation MutS adopts in  
103 the ATP-bound form. The ATP:ADP to AMPPNP<sub>2</sub>/ADP-V<sub>i2</sub> transition is the result of an  
104 additional ~6° twist of the ATPase domains along the axis of the helix at the bottom of the

105 ATPase domain (Fig. 1l), resulting in a further closing of the nucleotide binding site  
106 (Supplementary Video 1-2). This second rotation would result in a clash of the mismatch-  
107 binding domains of the two monomers (Fig. 1m), which may be the reason that the connector-  
108 and mismatch domains in one of the two monomers rotate towards the ATPase domains (Fig.  
109 1n, Supplementary Video 3). This rotation is identical to that observed in the ATP-induced  
110 DNA-bound, clamp state MutS<sup>22,25</sup>. However, in clamp state MutS both monomers have  
111 rotated the connector and mismatch domains. Of the four structures, only the ADP-bound state  
112 is compatible with DNA binding, as the closing of the lever domains in the ATP and  
113 AMPPNP/ADP-Vi bound structures blocks the entry channel for the DNA. This suggests that  
114 both monomers need to have hydrolysed ATP before MutS can bind DNA.

115

#### 116 **Closing of the MutS dimer completes the ATPase active site for hydrolysis**

117 Like all ABC ATPases, the MutS ATPase domains are composite active sites where residues  
118 from both monomers are required for ATP hydrolysis<sup>26</sup>. The four structures presented in this  
119 work illustrate how the two ATPase domains of both monomers come together to complete the  
120 MutS active site during ATP hydrolysis (Fig. 2a). The completion of the ATPase active site is  
121 driven by the negative charge of the  $\gamma$ -phosphate in ATP that forms an attractive force to the  
122 positive charge of the helix dipole<sup>27</sup> that is deposited via a serine (Ser668 in MutS) in the  
123 opposing monomer<sup>28</sup> (Fig. 1j-k, 2f). In the open, ADP<sub>2</sub>-bound form, the nucleotide is exposed  
124 and free to exchange with ATP molecules from solution (Fig. 2b). In contrast, in the closed  
125 ATP:ADP-bound and AMPPNP<sub>2</sub>/ADP-Vi<sub>2</sub>-bound structures the nucleotides in both monomers  
126 are encapsulated and likely slowed down in leaving the active site (Fig. 2c).

127 In the ATP-bound site of the ATP:ADP structure the signature motif (GxSTF, residues 666-  
128 670)<sup>29</sup> of the opposing monomer is further away from the tri-phosphate tail when compared to

129 the structure with AMPPNP and ADP-Vi (Fig. 2a). In addition, only weak density for  $Mg^{2+}$  is  
130 observed, indicative of a low occupancy (Fig. 2d). In contrast, in the structures of  
131  $AMPPNP_2/ADP-Vi_2$ -bound MutS the signature loop has moved closer to the phosphate tail of  
132 the nucleotide in the opposing monomer and aids in the coordination of the magnesium ion that  
133 shows well-defined density (Fig. 2d-f). These two states of the nucleotide binding site (e.g., a  
134 sub-optimal conformation in the ATP:ADP state and an optimal conformation in the  $AMPPNP_2$   
135 and  $ADP-Vi_2$  state) may be the reason for the bi-phasic ATP hydrolysis rate observed in stop-  
136 flow experiments on *E. coli* and *Thermus aquaticus* (Taq) MutS. Here an initial burst of  
137 ATPase activity is followed by a slower steady state activity<sup>30,31</sup>. It is possible that these two  
138 rates represent an initial double ATP occupancy of the nucleotide binding sites that are optimal  
139 for hydrolysis, followed by a slower rate that may be caused by an asymmetric occupancy  
140 (ADP:ATP) that is less optimal for hydrolysis and dictated by the alternating ATPase domains  
141<sup>32</sup>.

142 The active site conformation of the  $AMPPNP_2$  and  $ADP-Vi_2$  structures are identical except  
143 for the position of the  $\gamma$ -phosphate that in the  $ADP-Vi_2$  structure is replaced by the  $VO_4^{3-}$  ion  
144 that adopts a pentavalent coordination and has moved away from the  $\beta$ -phosphate, mimicking  
145 a post-hydrolysis transition state (Fig. 2d). As the  $AMPPNP_2/ADP-Vi_2$  structures represent the  
146 hydrolysis competent form, we will discuss the nucleotide binding site in these structure in  
147 more detail. The adenosine moiety of the nucleotide is held in place by Phe596 of monomer A  
148 (Phe596<sup>A</sup>) and His760<sup>A</sup> that stack on the base, while Asp616<sup>A</sup>, Lys620<sup>A</sup> and Thr622<sup>A</sup> of the  
149 Walker A motif (P-loop, residues 614-622) bind the phosphate tail. The  $Mg^{2+}$  is coordinated  
150 by oxygens of the  $\beta$ - and  $\gamma$ - phosphate of ATP<sup>A</sup> and Ser621<sup>A</sup>. The three water molecules that  
151 complete the octahedral coordination of  $Mg^{2+}$  that are observed in the crystal structure of MutS  
152 bound to a mismatch and ATP<sup>33</sup> are not defined in the cryo-EM maps but are compatible with  
153 the position of Asp693<sup>A</sup> and Asp661 from monomer B (Asp661<sup>B</sup>, Fig. 2e-f). Asp661<sup>B</sup> can

154 complement the nucleotide binding site of monomer A due to the closing of the MutS dimer  
155 that also brings Ser668<sup>B</sup> in close proximity of the  $\gamma$ -phosphate of ATP<sup>A</sup>. Ser668 is part of the  
156 signature motif found in ABC ATPases (sequence GxSTF<sup>29</sup>) and located immediately  
157 upstream of a helix that is pointed with its N-terminus towards the nucleotide in the opposite  
158 monomer. This helix deposits the positive charge of its helix dipole onto the negatively charged  
159 phosphate tail of the nucleotide through Ser668<sup>B</sup> (Fig. 2f). With the reduced charge on the  
160 phosphate tail and the proper coordination of the Mg<sup>2+</sup>, an activated water molecule can  
161 perform a nucleophilic attack on the  $\gamma$ -phosphate. It has been proposed that in the ABC ATPase  
162 Rad50, the equivalent of histidine 728<sup>A</sup> can activate a water molecule to perform the  
163 nucleophilic attack on the  $\gamma$ -phosphate<sup>34</sup>. This was corroborated by recent quantum mechanical  
164 and molecular mechanical modelling of the ABC transporter HlyB<sup>35</sup>. Accordingly, in our  
165 structure His728 is well positioned to activate a water molecule as it is pointing towards the  $\gamma$ -  
166 phosphate of AMPPNP. Mutation of any of the residues in the ATP active site described above  
167 results in a reduction or loss of ATPase activity (see Table 2).

168

## 169 **Two ATP molecules are needed to bring about clamp-state MutS**

170 The structures of AMPPNP<sub>2</sub>-bound and ADP-V<sub>i2</sub>-bound MutS show a large conformational  
171 change of the mismatch and connector domain in one of the monomers (Fig. 1n) that is identical  
172 to the conformational change observed in clamp-state MutS<sup>22,36</sup>. In the ATP:ADP-bound  
173 structure however, this conformational change is absent suggesting that a single ATP bound in  
174 the MutS dimer is not sufficient to generate enough force to displace the mismatch and  
175 connector domains, which is consistent with the observation that in yeast MSH2-MHS6, both  
176 monomers need to bind ATP to transform it into a DNA sliding clamp<sup>37</sup>. To determine if this  
177 is indeed the case, we measured the Förster resonance energy transfer (FRET) signal between



178 two fluorophores located on the connector domain (residue 246) of one monomer and on the  
179 ATPase domain (residue 798) of the opposing monomer (Fig. 3). Rotation of the connector  
180 domain reduces the distance between these two residues and consequently will increase the  
181 energy transfer between the two fluorophores. In the presence of ADP, we observe a low FRET  
182 signal as predicted from the distance in the ADP-bound structure (Fig 3). Similarly, in the  
183 presence of ATP there is no increase in the FRET signal. In contrast, using the non-  
184 hydrolysable analogue AMPPNP we observe an increase in the FRET signal as expected from  
185 the predicted rotation of the mismatch and connector domain observed in the AMPPNP-bound  
186 structures.

187 In the presence of mismatched DNA and ADP, we observe an increase in the FRET signal,  
188 possibly due the reduced flexibility of MutS on DNA, compared to apo MutS that is highly  
189 flexible in absence of DNA (Fig. 1i). In the presence of mismatched DNA and ATP, we observe  
190 a strong increase of the FRET signal, brought about by the formation of clamp state MutS in  
191 which the mismatch and connector domains of both monomers have moved closer to the  
192 ATPase domains<sup>22,25</sup>. In the presence of DNA and AMPPNP we also observe an increase in  
193 the FRET signal, although not as strong, possibly due to DNA-free MutS dimers that in the  
194 presence of AMPPNP are prevented from binding DNA (Fig. 1n).

195 Taken together, these results indicate that in the absence of DNA during steady state  
196 hydrolysis the MutS dimer binds only one ATP, consistent with the alternating ATPase  
197 domains of MutS that have been observed in multiple species<sup>32,38,39</sup> and the slow steady state  
198 ATP hydrolysis rate<sup>40</sup>. The single ATP occupancy in the MutS dimer is not enough to bring  
199 about a conformational change. This is also observed in mismatch bound MutS that can exist  
200 with a single nucleotide triphosphate bound, but not with two<sup>41</sup>. Concurrently, in the cryo-EM  
201 structure of clamp-state MutS, both monomers contain nucleotide triphosphate in their  
202 nucleotide binding site<sup>22</sup>. Moreover, the binding to DNA may actually promote the binding

203 two ATP molecules that are needed to induce the conformational change into the clamp state:  
204 the structures of MutS bound to homoduplex and mismatched DNA show the open  
205 conformation of the ATPase domains<sup>22</sup> that allows for the free exchange with ATP, giving  
206 MutS the possibility to load two ATP molecules. This is consistent with the fast release of ADP  
207 from mismatch-bound MutS, but not from free MutS<sup>17,42</sup>

208

### 209 **In clamp state MutS, dsDNA prevents nucleotide release from the ATPase active site**

210 Upon mismatch and ATP binding, MutS transform into the sliding clamp, that remains  
211 trapped on the DNA but can freely slide on the DNA until it reaches a stretch of ssDNA or a  
212 double strand break where it can dissociate<sup>18-21</sup>. How MutS is able to remain in the clamp state  
213 on DNA for prolonged periods is not known. One possibility is that ATP cannot be hydrolysed  
214 in the clamp state, thus keeping MutS in a closed state. However, comparison of the recent  
215 structure of clamp state MutS on DNA<sup>22</sup> reveals that the position of the ATPase domains is  
216 identical to that found in our ADP-Vi<sub>2</sub> structure, which mimics a post-hydrolysis transition  
217 state (Extended Data Fig. 4f). This implies that clamp-state MutS is able to hydrolyse and that  
218 therefore it is not ATP that keeps the dimer clamped around the DNA, in agreement with recent  
219 observation that Taq MutS can hydrolyse ATP in the clamp state<sup>43</sup>. Instead, it appears that it  
220 is the DNA that keeps the dimer closed. In the sliding clamp structure, the lever domains of the  
221 two monomers form an arc that surrounds the DNA duplex and interact with the DNA  
222 backbone through numerous residues with a footprint of ~ 10 base pairs (Fig. 4a-b). In this  
223 conformation the ATPase domains are closed, and the nucleotides trapped in the nucleotide  
224 binding sites (Fig. 2c). Correspondingly, clamp-state MutS can only release the DNA at open  
225 ends or single stranded DNA<sup>18-21</sup>. Large stretches of ssDNA are produced during downstream  
226 events of the mismatch repair cascade through the action of A DNA helicase and DNA  
227 exonucleases, which are likely to be encountered by clamp-state MutS, in contrast to double

228 strand breaks, that are not known to play a role in mismatch repair. To measure the minimal  
229 length of the ssDNA gap needed to release clamp-state MutS from DNA, we used bio-layer  
230 interferometry to measure the release from a DNA substrate containing a mismatch and  
231 different sizes of ssDNA gaps in presence of 2 mM ATP (Fig. 4c). The dissociation rate of  
232 MutS clamps increases with the size of the single stranded gap, from  $0.02\text{ s}^{-1}$  on dsDNA or  
233 nicked DNA until it reaches a plateau at  $0.08\text{ s}^{-1}$  at a gap of 10 nucleotides or longer (Fig. 4d-  
234 e). The ten-nucleotide gap is equal in size to the DNA footprint of the MutS dimer (Fig. 4b),  
235 fitting with the notion that as the interactions with the dsDNA are lost, the dimer is no longer  
236 able to remain clamped around the DNA and consequently falls off. Hence, by generating  
237 ssDNA gaps, UvrD and exonuclease do not only remove the mismatch, but also generate a  
238 simple release mechanism for MutS that would otherwise remain trapped on the DNA.

239

240

## 241 **Discussion**

### 242 **DNA and ATP work together to coordinate the sequential steps of the repair cascade.**

243 The four structures presented here provide a detailed view on the mechanism of ATP  
244 hydrolysis and how the opening and closing of the dimer is at the core of the catalytic activity.  
245 Combined with our recent structures of DNA-bound MutS during different stages of the repair  
246 process <sup>22</sup>, these new structures reveal how ATP hydrolysis and DNA binding co-operate to  
247 coordinate the sequential steps of the mismatch repair pathway. In the absence of DNA, the  
248 two MutS monomers freely open and close during ATP binding and hydrolysis (Fig. 5a). Due  
249 to the alternating ATPase domains of MutS, only one ATP is bound by the dimer, preventing  
250 it from assuming the most compact form, which is only reached with the non-hydrolysable  
251 ATP analogues AMPPNP or ATP $\gamma$ S. When MutS associates with homoduplex DNA in search

252 for a mismatch, the DNA holds the dimer in an open form thus preventing ATP hydrolysis  
253 (Fig. 5b). In this open conformation, the two nucleotide binding sites are freely accessible  
254 enabling the loading of two ATP molecules. This open conformation of the ATPase domains  
255 is retained when MutS first encounters a mismatch. However, mismatch binding induces a  
256 small rearrangement of the clamp domains that acts as a licensing step that enable MutS to  
257 transform into the sliding clamp<sup>22</sup> but not before both monomers bind ATP.

258 This transformation into the clamp-state involves a  $\sim 160^\circ$  rotation of the mismatch and  
259 connector domains of both monomers a  $\sim 20$  Å translation of the DNA towards the centre of  
260 the dimer as the lever domains cross each other firmly locking the DNA in the MutS clamp  
261 (Fig. 5c)<sup>22</sup>. In the clamp state, the ATPase active sites are compatible with ATP hydrolysis,  
262 yet due to the interactions between the MutS lever domains, the two monomers cannot open  
263 up, presumably keeping the ADP-Pi trapped in the nucleotide binding site and preventing the  
264 ATPase cycle to continue. Only when MutS encounters ssDNA, generated by UvrD and 5'-3'  
265 or 3'-5' exonucleases during excision of the newly synthesized strand it is able to release itself  
266 from the DNA and resume the hydrolysis cycle.

267 Thus, as the repair process continues, the size of the ssDNA is increased towards the  
268 mismatch, reducing the time that MutS molecules reside on the DNA, until the mismatch is  
269 removed and no more loading of MutS molecules takes place. Due to the low processivity of  
270 UvrD in the absence of MutS and MutL, the excision of the DNA will soon cease after the  
271 removal of a mismatch leaving the DNA open to be resynthesized by a DNA polymerase,  
272 completing the repair process.

273

274

275 **Acknowledgement**

276 We thank staff at the LUMC EM facility and The Netherlands Center for Electron  
277 Nanoscopy (NeCEN) for help with data collection and data processing. We thank Rafael  
278 Fernandez-Leiro for advice on data processing. This work has been supported by a LUMC  
279 Research Fellowship to M.H.L., a European Community's Horizon2020 Marie Skłodowska  
280 Curie grant (722433) to P.F., and a European Community's Horizon2020 Innovative Training  
281 Network Grant to A.B. and V.K.. Access to NeCEN was supported by the Netherlands Electron  
282 Microscopy Infrastructure (NEMI), project 184.034.014 of the National Roadmap for Large-  
283 Scale Research Infrastructure of the Dutch Research Council (NWO).

284

#### 285 **Author contributions**

286 M.H.L. and A.B. conceived the overall experimental design; A.B. prepared samples,  
287 collected and processed cryo-EM data; A.B. purified proteins and performed BLI experiments.  
288 V.K. performed FRET experiments; A.B. and M.H.L. wrote the manuscript with contributions  
289 from all authors.

290

#### 291 **Competing interests**

292 The authors declare no competing interest.

293

294

295

296

## 297 **Methods**

## 298 **Materials**

299 All chemicals were purchased from Sigma Aldrich, unless indicated otherwise. All  
300 chromatography columns were purchased from Cytiva.

301

## 302 **Protein Expression and Purification**

303 The dimeric version of *E. coli* MutS, R840E<sup>36</sup> was cloned into vector pETNKI-his3C-LIC-  
304 amp<sup>44</sup>. Plasmids were transformed in *E. coli* BL21(DE3) pLysS cells and plated onto LB-agar  
305 with 50 µg/ml chloramphenicol and 100 µg/ml ampicillin. All the colonies were scraped from  
306 the plate and distributed over 6 x 500 ml Terrific Broth supplemented with 50 µg/ml  
307 chloramphenicol, 100 µg/ml ampicillin, 1 mM MgCl<sub>2</sub> and 1% glucose. Cells were grown at  
308 37°C to OD<sub>600</sub> ~7, diluted with 1 volume Terrific Broth and induced with a final concentration  
309 of 1 mM isopropyl 1-thio-β-D-galactopyranoside (IPTG) for 2 hrs at 30 °C. The proteins were  
310 purified using a modified procedure from<sup>45</sup>. All subsequent steps were performed using basic  
311 buffer (25 mM Hepes pH 7.5, 5mM MgCl<sub>2</sub>, 2 mM DTT) supplemented with NaCl or Imidazole  
312 as indicated.

313 Harvested cells were resuspended in basic buffer with 500 mM NaCl and 10 mM imidazole  
314 and lysed by sonication, followed by centrifugation at 14k x g. The supernatant was injected  
315 onto a 5 ml HisTrap HP column and eluted with a gradient to 500 mM Imidazole in basic buffer  
316 with 500 mM NaCl. Pooled fractions were diluted in ten volumes of basic buffer, injected  
317 onto 5 ml HiTrap Heparin column and eluted with a gradient to 1 M NaCl in basic buffer.  
318 Pooled fractions were concentrated and injected into a gel filtration column Superdex 200  
319 16/600 equilibrated in basic buffer with 100 mM NaCl. Pooled fractions were injected onto a  
320 5 ml HiTrap Q column equilibrated in the same buffer and eluted with a gradient to 1M NaCl  
321 in basic buffer.

322

## 323 **Cryo-EM sample preparation and imaging**

324 Purified MutS was diluted to 4  $\mu$ M in 20 mM Tris pH 8.5, NaCl 150 mM, 5mM MgCl<sub>2</sub>, 2  
325 mM DTT and 0.01% (w/v) Tween 20. The diluted protein was incubated with 3 mM of either  
326 ADP, ATP, AMPPNP or ADP-Vi. Cu R1.2/1.3 or R2/1 holey carbon grids (Quantifoil,  
327 Groslöbichau, Germany) were glow discharged at 25 mA for 45 seconds using an Emitech  
328 K950 apparatus (Quorum, Laughton, United Kingdom). 3  $\mu$ l of MutS-nucleotide sample were  
329 adsorbed onto glow-discharged grids and blotted for 1 second at 80% humidity at 4°C and flash  
330 frozen in liquid ethane using an EM GP plunge freezer (Leica). All cryo-EM data was collected  
331 at the The Netherlands Center for Electron Nanoscopy (NeCEN). The grids were loaded into a  
332 Titan Krios (FEI) electron microscope operating at 300 kV with a K2 or K3 direct electron  
333 detector equipped with a Bioquantum energy filter (Gatan, Pleasanton USA). The slit width of  
334 the energy filter was set to 20 eV. Images were recorded with EPU software (Thermo Fisher  
335 Scientific) in counting mode. Dose, magnification and effective pixel size are detailed in Table  
336 1.

337

## 338 **Cryo-EM image processing**

339 All image processing was performed using Relion 3.1<sup>46</sup>. The images were drift corrected  
340 using Relion's own (CPU-based) implementation of the UCSF Motioncor2 program, and  
341 defocus was estimated using gCTF<sup>47</sup>. LoG-based auto-picking was performed on a subset of  
342 micrographs and picked particles were 2D classified. Selected classes from the 2D  
343 classification were used as references to autopick particles from the full data sets. After two or  
344 three rounds of 2D classification, classes with different orientations were selected for initial  
345 model generation in Relion. The initial model was used as reference for 3D classification into  
346 different classes. The selected classes from 3D classification were subjected to 3D auto

347 refinement. The defocus values were further refined using CTF Refinement in Relion followed  
348 by Bayesian polishing. Another round of 3D auto refinement was performed on these polished  
349 particles. The density for MutS ADP-Vi was improved by using focused classification without  
350 image alignment. All maps were post-processed to correct for modulation transfer function of  
351 the detector and sharpened by applying a negative B factor, as determined automatically by  
352 Relion. A soft mask was applied during post processing to generate FSC curves to yield maps  
353 of average resolutions of 3.4 Å for MutS AMPPNP, 4.8 Å for MutS ADP, 3.8 Å for MutS  
354 ADP-Vi and 3.3 Å for MutS ATP.

355 Model building was performed using Coot<sup>48</sup>, REFMAC5<sup>49</sup>, the CCPEM-suite<sup>50</sup> and Phenix  
356<sup>51</sup>. For the ATP:ADP, AMPPNP<sub>2</sub> and ADPVi<sub>2</sub> structures we could build detailed model into  
357 the high-resolution maps, while for the ADP<sub>2</sub> was limited to rigid body fitting of existing  
358 structures and restrained refinement with REFMAC. Details on model refinement and  
359 validation are in Table 1. In brief, model building started by rigid-body fitting known crystal  
360 structures (PDB 1E3M and PDB 5AKB) into the different maps using Coot. Next, we carried  
361 out one round of refinement in Refmac5 using jelly-body restraints, and the model was further  
362 adjusted in Coot. After initial refinement, we generated improved-resolution EM maps using  
363 the SuperEM method<sup>52</sup>, which aided in model building and refinement. A final refinement  
364 round and validation of the model and data were carried out using Refmac5 with proSmart  
365 restraints within the CCPEM suite, with additional model validation using MolProbity within  
366 Phenix.

367

### 368 **Negative stain EM sample preparation and imaging**

369 Purified MutS was diluted to 0.04 µM in 20 mM Tris pH 8.5, NaCl 150 mM, 5mM MgCl<sub>2</sub>,  
370 2mM DTT, 0.01% Tween20 and 1 mM ADP. Grids were glow discharged 60 seconds at 25



371 mA using an EMITECH K950 apparatus. Three  $\mu\text{l}$  of sample were absorbed to glow-  
372 discharged carbon-coated copper grids (C-Flat200-CU) and incubated for 30 s, before being  
373 partially blotted. The grids were sequentially stained with three  $\mu\text{l}$  of 2.3% uranyl acetate,  
374 incubated for 30 s and then blotted dry. Micrographs were collected on an FEI Tecnai Biotwin  
375 electron microscope equipped with a LaB6 filament and operated at 120 kV and 49,000 $\times$   
376 nominal magnification. The total dose was 20  $e^-/\text{\AA}^2$  and the defocus values ranged from -0.5  
377 to -3.0  $\mu\text{m}$ . Images were collected with a FEI Eagle 4k x 4K CCD camera with final pixel size  
378 of 4.44  $\text{\AA}$ .

379

### 380 **Negative stain image processing**

381 All image processing was performed using Relion 3.1<sup>46</sup>. Contrast transfer function  
382 estimation was performed with CTFFIND4.1<sup>53</sup>. A small set of particles were manually picked,  
383 2D classified and used as references for the auto picking procedure. 7845 particles were  
384 extracted from a total of 73 micrographs. The extraction procedure was performed without  
385 inverting contrast. Extracted particles were subjected to reference-free 2D average without  
386 performing CTF correction.

387

### 388 **Biolayer Interferometry DNA substrates**

389 Six different DNA substrates with different gap lengths were prepared for the assays  
390 (Supplementary Table 1). The substrates were prepared as follows: monovalent streptavidin  
391 and a 5' biotinylated primer were mixed in a 1:1 ratio at a nominal concentration of 20  $\mu\text{M}$  and  
392 purified via analytical gel filtration using a Superdex 200 increase (3.2/30) column (Cytiva)  
393 equilibrated in Tris 10 mM pH 8.0, NaCl 50 mM, EDTA 1mM. Fractions containing  
394 biotinylated primer were mixed with the 5' biotinylated DNA template to create the final DNA

395 substrate. The efficient annealing of primer and template was confirmed with a 15%  
396 polyacrylamide 0.5 x Tris Borate EDTA gel. Annealed substrates were stored at -20°C at a  
397 concentration of 5 µM.

398

### 399 **Biolayer Interferometry DNA assay**

400 Association and dissociation kinetics between MutS and DNA were observed using the  
401 Octet RED96 (Sartorius, Göttingen, Germany). All interactions studies were performed with  
402 Streptavidin biosensors (Sartorius, Göttingen, Germany) conjugated to the biotinylate DNA  
403 substrates. All the experiments were performed in the following buffer: Hepes 25 mM pH 7.5,  
404 NaCl 150 mM, MgCl<sub>2</sub> 5mM, DTT 2mM, BSA 0.5 mg/ml, Tween 20 0.01%. The DNA  
405 substrates were added in the loading step at 100 nM, until the threshold value of 0.36 nm was  
406 reached. The association step was performed with MutS 200 nM in presence of 2 mM ATP.  
407 The dissociation step was performed in buffer with 2mM ATP. Kinetic analysis were  
408 performed using the Octet Data Analysis software package version 7.1.

409

### 410 **FRET assay**

411 Förster Resonance Energy Transfer (FRET) between labelled connector domain of one  
412 subunit and the ATPase domain of the other subunit was measured using heterodimeric MutS  
413 dimers similar as described before <sup>36</sup>. For labelling, proteins were diluted to 40 µM in 150 µl  
414 of buffer (10 mM HEPES/KOH (pH 8.0), 200 mM KCl and 1 mM EDTA) and labelled with a  
415 5-fold molar excess of Alexa Fluor 488 maleimide or Alexa Fluor 647 maleimide (Invitrogen,  
416 Thermo Fisher Scientific, Waltham, MA) for 2 hours on ice in the dark according to the  
417 manufacturer's instruction. Excessive dye was removed using Zeba Spin Desalting columns  
418 (Thermo Fisher Scientific, Waltham, MA). The degree of labelling was determined from the

419 absorbance spectra recorded from 220–700 nm (nanodrop) according to the manufactures  
420 instructions as described previously<sup>36</sup>. Heterodimers were allowed to form by mixing 10  $\mu$ M  
421 of MutS798C labelled with Alexa Fluor 488 and MutS246C labelled with Alexa Fluor 647,  
422 and incubation on ice for at least 1.5 hours in the absence of nucleotides in buffer (25 mM  
423 HEPES-KOH pH 7.5, 5 mM MgCl<sub>2</sub>, 150 mM KCl, and 0.05 % (v/v) Tween 20). Aliquots of  
424 the reaction were flash-frozen in liquid nitrogen and stored at -80 °C. A 30-bp DNA substrate  
425 with a central G:T mismatch was prepared by annealing T-strand (5' dig-  
426 AATTGCACCGAGCTTGATCCTCGATGATCC-dig 3') with G-strand (5'  
427 GGATCATCGAGGATCGAGCTCGGTGCAATT 3'). Underlines mark the G:T mismatch.  
428 The T-strand contains digoxigenin on either side, so that both DNA ends are blocked with 200  
429 nM anti-digoxigenin Fab fragments (Roche Diagnostics, F. Hoffmann-La Roche Ltd,  
430 Switzerland)

431 MutS heterodimers (50 nM monomer) were pre-incubated in 200  $\mu$ l of FB150 buffer (25  
432 mM HEPES-KOH pH 7.5, 5 mM MgCl<sub>2</sub>, 150 mM KCl, and 0.05 % (v/v) Tween 20) in 96-  
433 well plates at room temperature for 120 seconds. Next, 50 nM of the G:T DNA substrate was  
434 added, followed by addition of 1 mM ATP, ADP, or AMPPNP (Jena Bioscience,  
435 Jena, Germany, and AMPPNP from Sigma-Aldrich).

436 FRET was determined by measuring the fluorescence signals in microplate reader (TECAN  
437 infinite F200, Tecan Group Ltd, Switzerland) before and 10 minutes later after the addition of  
438 the dNTPs. Fluorescence signals were measured in three channels (donor, acceptor, FRET)  
439 with the following filter combinations: (donor ex. 450 nm (width 20 nm) em. 535 nm (width  
440 25 nm), acceptor ex. 620 nm (width 10 nm) em. 670 nm (width 25 nm), FRET ex. 485 nm  
441 (width 20 nm) em. 670 nm (width 25 nm) filter.

442

**Table 1 | Cryo-EM data collection, refinement and validation statistics**

|                                                  | ADP          | ATP:ADP     | AMPPNP      | ADP-Vi      |
|--------------------------------------------------|--------------|-------------|-------------|-------------|
| <b>Data collection and processing</b>            |              |             |             |             |
| Magnification                                    | x130,000     | x105,000    | x130,000    | x130,000    |
| Voltage (kV)                                     | 300          | 300         | 300         | 300         |
| Electron exposure e <sup>-</sup> /Å <sup>2</sup> | 57           | 54          | 54          | 34          |
| Defocus range (µm)                               | -1 to -2.5   | -0.5 to -2  | -1 to -2.5  | -0.5 to -2  |
| Pixel size (Å)                                   | 1.06         | 0.866       | 1.06        | 0.66        |
| Symmetry imposed                                 | C1           | C1          | C1          | C1          |
| Initial particle images (no)                     | 110,730      | 527,979     | 294,231     | 496,416     |
| Final particle images (no)                       | 41,730       | 151,672     | 147,899     | 81,316      |
| Map resolution (Å)                               | 4.8          | 3.3         | 3.4         | 3.8         |
| FSC threshold                                    | 1.43         | 1.43        | 1.43        | 1.43        |
| Map resolution range (Å)                         | 4.5 to >10.7 | 3.3 to >4.8 | 3.4 to >4.3 | 3.7 to >6.9 |
| <b>Refinement</b>                                |              |             |             |             |
| Initial model used (PDB code)                    | 1E3M         | AMPPNP      | 1E3M        | AMPPNP      |
| Model resolution (Å)                             | 7.8          | 3.6         | 3.4         | 4.0         |
| FSC threshold                                    | 0.5          | 0.5         | 0.5         | 0.5         |
| Map sharpening B factor (Å <sup>2</sup> )        | -50          | -80         | -80         | -70         |
| <b>Model comparison</b>                          |              |             |             |             |
| Nonhydrogen atoms                                | 10338        | 10955       | 10336       | 10800       |
| Protein residues                                 | 1320         | 1393        | 1318        | 1373        |
| <b>B factors (Å<sup>2</sup>)</b>                 |              |             |             |             |
| Protein                                          | 35-159       | 35-337      | 34-307      | 21-306      |
| <b>r.m.s deviations</b>                          |              |             |             |             |
| Bond lengths (Å <sup>2</sup> )                   | 0.013        | 0.012       | 0.014       | 0.013       |
| Bond angles (°)                                  | 1.552        | 1.492       | 1.783       | 1.627       |
| <b>Validation</b>                                |              |             |             |             |
| MolProbity score                                 | 1.20         | 1.31        | 1.16        | 1.26        |
| Clashscore                                       | 4.19         | 5.73        | 3.71        | 4.94        |
| Poor rotamers (%)                                | 0.09         | 0.96        | 0.00        | 0.09        |
| <b>Ramachandran plot</b>                         |              |             |             |             |
| Favored (%)                                      | 98.46        | 98.39       | 98.46       | 97.64       |
| Allowed (%)                                      | 1.46         | 1.61        | 1.46        | 2.36        |
| Disallowed (%)                                   | 0.08         | 0.00        | 0.08        | 0.00        |

**Table 2 | Effect of mutations on the ATPase activity of *E. coli* MutS**

| <b>Mutation</b> | <b>Reduction (fold)</b> | <b>Reference</b> |
|-----------------|-------------------------|------------------|
| Phe596Ala       | 2                       | Yang 2001        |
| Lys620Ala       | 26                      | Haber 1991       |
| Asp661Ala       | 1                       | Acharya 2008     |
| Ser668Ala       | 4                       | Lamers 2004      |
| Asn616Ala       | 5                       | Lamers 2004      |
| His728Ala       | 25                      | Lamers 2004      |
| Asp693Ala       | 22                      | Yang 2001        |

Reduction in ATPase activity compared to wild type MutS.

444

445

## 446 **References**

447

- 448 1. Li, Z., Pearlman, A. H. & Hsieh, P. DNA mismatch repair and the DNA damage  
449 response. *DNA Repair (Amst)* **38**, 94–101 (2016).
- 450 2. Jiricny, J. Postreplicative mismatch repair. *Cold Spring Harb Perspect Biol* **5**, a012633  
451 (2013).
- 452 3. Welsh, K. M., Lu, A. L., Clark, S. & Modrich, P. Isolation and characterization of the  
453 *Escherichia coli* mutH gene product. *J. Biol. Chem.* **262**, 15624–15629 (1987).
- 454 4. Junop, M. S., Yang, W., Funchain, P., Clendenin, W. & Miller, J. H. In vitro and in  
455 vivo studies of MutS, MutL and MutH mutants: correlation of mismatch repair and  
456 DNA recombination. *DNA Repair (Amst)* **2**, 387–405 (2003).
- 457 5. Hall, M. C. & Matson, S. W. The *Escherichia coli* MutL protein physically interacts  
458 with MutH and stimulates the MutH-associated endonuclease activity. *J. Biol. Chem.*  
459 **274**, 1306–1312 (1999).
- 460 6. Kadyrov, F. A., Dzantiev, L., Constantin, N. & Modrich, P. Endonucleolytic function  
461 of MutL $\alpha$  in human mismatch repair. *Cell* **126**, 297–308 (2006).
- 462 7. Fukui, K., Nishida, M., Nakagawa, N., Masui, R. & Kuramitsu, S. Bound nucleotide  
463 controls the endonuclease activity of mismatch repair enzyme MutL. *J. Biol. Chem.*  
464 **283**, 12136–12145 (2008).
- 465 8. Pluciennik, A. *et al.* PCNA function in the activation and strand direction of MutL $\alpha$   
466 endonuclease in mismatch repair. *Proc. Natl. Acad. Sci. USA* **107**, 16066–16071  
467 (2010).

- 468 9. Pillon, M. C., Miller, J. H. & Guarné, A. The endonuclease domain of MutL interacts  
469 with the  $\beta$  sliding clamp. *DNA Repair (Amst)* **10**, 87–93 (2011).
- 470 10. Yang, H., Yung, M., Sikavi, C. & Miller, J. H. The role of Bacillus anthracis RecD2  
471 helicase in DNA mismatch repair. *DNA Repair (Amst)* **10**, 1121–1130 (2011).
- 472 11. Walsh, B. W. *et al.* RecD2 helicase limits replication fork stress in Bacillus subtilis. *J.*  
473 *Bacteriol.* **196**, 1359–1368 (2014).
- 474 12. Burdett, V., Baitinger, C., Viswanathan, M., Lovett, S. T. & Modrich, P. In vivo  
475 requirement for RecJ, ExoVII, ExoI, and ExoX in methyl-directed mismatch repair.  
476 *Proc. Natl. Acad. Sci. USA* **98**, 6765–6770 (2001).
- 477 13. Yamaguchi, M., Dao, V. & Modrich, P. MutS and MutL activate DNA helicase II in a  
478 mismatch-dependent manner. *J. Biol. Chem.* **273**, 9197–9201 (1998).
- 479 14. Lahue, R. S., Au, K. G. & Modrich, P. DNA mismatch correction in a defined system.  
480 *Science* **245**, 160–164 (1989).
- 481 15. Goellner, E. M., Putnam, C. D. & Kolodner, R. D. Exonuclease 1-dependent and  
482 independent mismatch repair. *DNA Repair (Amst)* **32**, 24–32 (2015).
- 483 16. Schofield, M. J., Nayak, S., Scott, T. H., Du, C. & Hsieh, P. Interaction of Escherichia  
484 coli MutS and MutL at a DNA mismatch. **276**, 28291–28299 (2001).
- 485 17. Acharya, S., Foster, P. L., Brooks, P. & Fishel, R. The coordinated functions of the E.  
486 coli MutS and MutL proteins in mismatch repair. **12**, 233–246 (2003).
- 487 18. Gradia, S. *et al.* hMSH2-hMSH6 forms a hydrolysis-independent sliding clamp on  
488 mismatched DNA. **3**, 255–261 (1999).
- 489 19. Blackwell, L. J., Bjornson, K. P., Allen, D. J. & Modrich, P. Distinct MutS DNA-  
490 binding modes that are differentially modulated by ATP binding and hydrolysis. **276**,  
491 34339–34347 (2001).

- 492 20. Heo, S.-D., Cho, M., Ku, J. K. & Ban, C. Steady-state ATPase activity of *E. coli* MutS  
493 modulated by its dissociation from heteroduplex DNA. *Biochem Biophys Res Commun*  
494 **364**, 264–269 (2007).
- 495 21. Jeong, C. *et al.* MutS switches between two fundamentally distinct clamps during  
496 mismatch repair. *Nat. Struct. Mol. Biol.* (2011). doi:10.1038/nsmb.2009
- 497 22. Fernandez-Leiro, R. *et al.* The selection process of licensing a DNA mismatch for  
498 repair. *Nat. Struct. Mol. Biol.* **28**, 373–381 (2021).
- 499 23. Hingorani, M. M. Mismatch binding, ADP–ATP exchange and intramolecular  
500 signaling during mismatch repair. *DNA Repair (Amst)* **38**, 24–31 (2016).
- 501 24. Davies, D. R. & Hol, W. G. J. The power of vanadate in crystallographic  
502 investigations of phosphoryl transfer enzymes. *FEBS Lett.* **577**, 315–321 (2004).
- 503 25. Groothuizen, F. S. *et al.* MutS/MutL crystal structure reveals that the MutS sliding  
504 clamp loads MutL onto DNA. *Elife* **4**, e06744 (2015).
- 505 26. Hopfner, K.-P. Invited review: Architectures and mechanisms of ATP binding cassette  
506 proteins. *Biopolymers* **105**, 492–504 (2016).
- 507 27. Hol, W. G. The role of the alpha-helix dipole in protein function and structure. *Prog*  
508 *Biophys Mol Biol* **45**, 149–195 (1985).
- 509 28. Hopfner, K.-P. & Tainer, J. A. Rad50/SMC proteins and ABC transporters: unifying  
510 concepts from high-resolution structures. *Curr Opin Struct Biol* **13**, 249–255 (2003).
- 511 29. Acharya, S. Mutations in the signature motif in MutS affect ATP-induced clamp  
512 formation and mismatch repair. *Mol Microbiol* **69**, 1544–1559 (2008).
- 513 30. Bjornson, K. P., Allen, D. J. & Modrich, P. Modulation of MutS ATP hydrolysis by  
514 DNA cofactors. *Biochemistry* **39**, 3176–3183 (2000).



- 515 31. Antony, E. & Hingorani, M. M. Asymmetric ATP binding and hydrolysis activity of  
516 the *Thermus aquaticus* MutS dimer is key to modulation of its interactions with  
517 mismatched DNA. **43**, 13115–13128 (2004).
- 518 32. Lamers, M. H., Winterwerp, H. H. K. & Sixma, T. K. The alternating ATPase domains  
519 of MutS control DNA mismatch repair. **22**, 746–756 (2003).
- 520 33. Lamers, M. H. *et al.* ATP increases the affinity between MutS ATPase domains.  
521 Implications for ATP hydrolysis and conformational changes. **279**, 43879–43885  
522 (2004).
- 523 34. Hopfner, K. P. *et al.* Structural biology of Rad50 ATPase: ATP-driven conformational  
524 control in DNA double-strand break repair and the ABC-ATPase superfamily. *Cell*  
525 **101**, 789–800 (2000).
- 526 35. Zhou, Y., Ojeda-May, P. & Pu, J. H-loop histidine catalyzes ATP hydrolysis in the E.  
527 coli ABC-transporter HlyB. *Phys. Chem. Chem. Phys.* **15**, 15811–15815 (2013).
- 528 36. Groothuizen, F. S. *et al.* Using stable MutS dimers and tetramers to quantitatively  
529 analyze DNA mismatch recognition and sliding clamp formation. *Nucleic Acids Res.*  
530 **41**, 8166–8181 (2013).
- 531 37. Mazur, D. J., Mendillo, M. L. & Kolodner, R. D. Inhibition of Msh6 ATPase activity  
532 by mispaired DNA induces a Msh2(ATP)-Msh6(ATP) state capable of hydrolysis-  
533 independent movement along DNA. *Mol. Cell* **22**, 39–49 (2006).
- 534 38. Iaccarino, I., Marra, G., Palombo, F. & Jiricny, J. hMSH2 and hMSH6 play distinct  
535 roles in mismatch binding and contribute differently to the ATPase activity of  
536 hMutSalpha. *EMBO J.* **17**, 2677–2686 (1998).
- 537 39. Studamire, B., Quach, T. & Alani, E. *Saccharomyces cerevisiae* Msh2p and Msh6p  
538 ATPase activities are both required during mismatch repair. *Mol Cell Biol* **18**, 7590–  
539 7601 (1998).

- 540 40. Sharma, A., Doucette, C., Biro, F. N. & Hingorani, M. M. Slow conformational  
541 changes in MutS and DNA direct ordered transitions between mismatch search,  
542 recognition and signaling of DNA repair. *J. Mol. Biol.* **425**, 4192–4205 (2013).
- 543 41. Monti, M. C. *et al.* Native mass spectrometry provides direct evidence for DNA  
544 mismatch-induced regulation of asymmetric nucleotide binding in mismatch repair  
545 protein MutS. *Nucleic Acids Res.* **39**, 8052–8064 (2011).
- 546 42. Gradia, S., Acharya, S. & Fishel, R. The human mismatch recognition complex  
547 hMSH2-hMSH6 functions as a novel molecular switch. **91**, 995–1005 (1997).
- 548 43. Hao, P. *et al.* Recurrent mismatch binding by MutS mobile clamps on DNA localizes  
549 repair complexes nearby. *Proc. Natl. Acad. Sci. USA* **117**, 17775–17784 (2020).
- 550 44. Luna-Vargas, M. P. A. *et al.* Enabling high-throughput ligation-independent cloning  
551 and protein expression for the family of ubiquitin specific proteases. *J. Struct. Biol.*  
552 **175**, 113–119 (2011).
- 553 45. Feng, G. & Winkler, M. E. Single-step purifications of His6-MutH, His6-MutL and  
554 His6-MutS repair proteins of escherichia coli K-12. *BioTechniques* **19**, 956–965  
555 (1995).
- 556 46. Zivanov, J. *et al.* New tools for automated high-resolution cryo-EM structure  
557 determination in RELION-3. *Elife* **7**, 163 (2018).
- 558 47. Zhang, K. Gctf: Real-time CTF determination and correction. *J. Struct. Biol.* **193**, 1–12  
559 (2016).
- 560 48. Emsley, P., Lohkamp, B., Scott, W. G. & Cowtan, K. Features and development of  
561 Coot. *Acta Crystallogr. D Biol. Crystallogr.* **66**, 486–501 (2010).
- 562 49. Murshudov, G. N. *et al.* REFMAC5 for the refinement of macromolecular crystal  
563 structures. *Acta Crystallogr. D Biol. Crystallogr.* **67**, 355–367 (2011).

- 564 50. Nicholls, R. A., Tykac, M., Kovalevskiy, O. & Murshudov, G. N. Current approaches  
565 for the fitting and refinement of atomic models into cryo-EM maps using CCP-EM.  
566 *Acta Crystallogr D Struct Biol* **74**, 492–505 (2018).
- 567 51. Liebschner, D. *et al.* Macromolecular structure determination using X-rays, neutrons  
568 and electrons: recent developments in Phenix. *Acta Crystallogr D Struct Biol* **75**, 861–  
569 877 (2019).
- 570 52. Subramaniya, S. R. M. V., Terashi, G. & Kihara, D. **Super-Resolution Cryo-EM**  
571 **Maps With 3D Deep Generative Networks.** *bioRxiv* 1–30 (2021).  
572 doi:10.1101/2021.01.12.426430
- 573 53. Rohou, A. & Grigorieff, N. CTFFIND4: Fast and accurate defocus estimation from  
574 electron micrographs. *J. Struct. Biol.* **192**, 216–221 (2015).
- 575

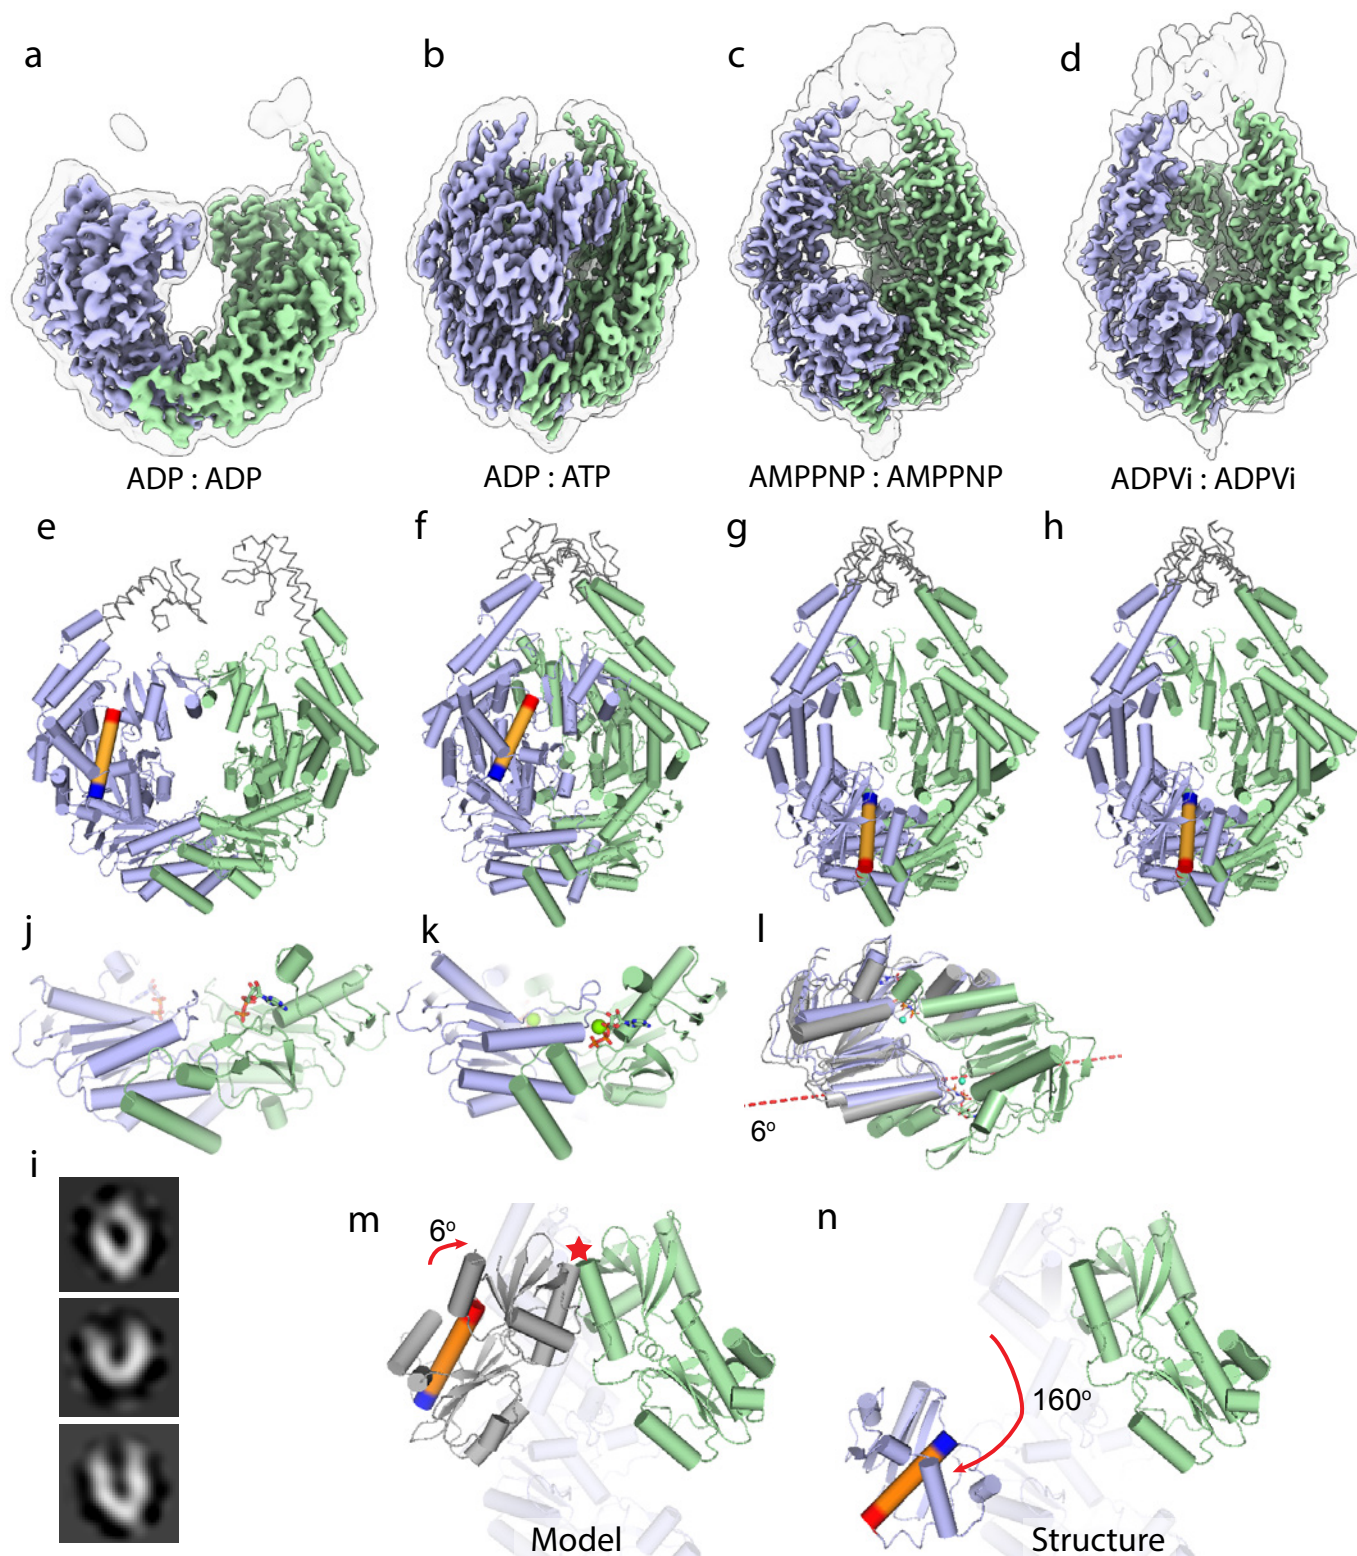

**Fig. 1 | Structures of MutS at sequential steps of the ATP hydrolysis cycle.** Cryo-EM maps of **a**, ADP-bound MutS, **b**, ATP-bound MutS, **c**, AMPPNP-bound MutS and **d**, ADP-Vi-bound MutS. Monomer A is shown in green, monomer B in blue. Transparent outlines show the same cryo-EM maps at lower contour level. **e-h**, Models of ADP, ATP, AMPPNP, and ADP-Vi bound MutS. Grey ribbon part of the models indicate approximate position of the missing clamp and lever domains that are poorly defined in the cryo-EM map. A central helix in the connector domain (residues 231 to 248) is colored in orange, with N- and C-termini colored in blue and red, respectively. **i**, Negative stain 2D classes of ADP-bound MutS showing the flexibility of the MutS dimer. **j-k**, Transition of the ATPase domains from ADP<sub>2</sub> to ATP:ADP-bound MutS that is a result of a 35° rotation of the two monomers. Yellow arrows indicate helix dipole that is attracted by the negative charge of the triphosphate in the opposite monomer. **k**, Transition of the ATPase domains from the ATP:ADP to AMPPNP<sub>2</sub>-bound MutS. Grey model represent the original position of monomer B before the 6° rotation, dashed red line represents the rotation axis of monomer B. **m**, Model of the AMPPNP<sub>2</sub>-bound MutS without the movement of the mismatch and connector domain. The red star indicated the clash between mismatch binding domain of monomer A (coloured green) and monomer B (coloured grey). Core domain and ATPase domain omitted for clarity. **n**, The rotation of mismatch and connector domain circumvents the clash with monomer A.

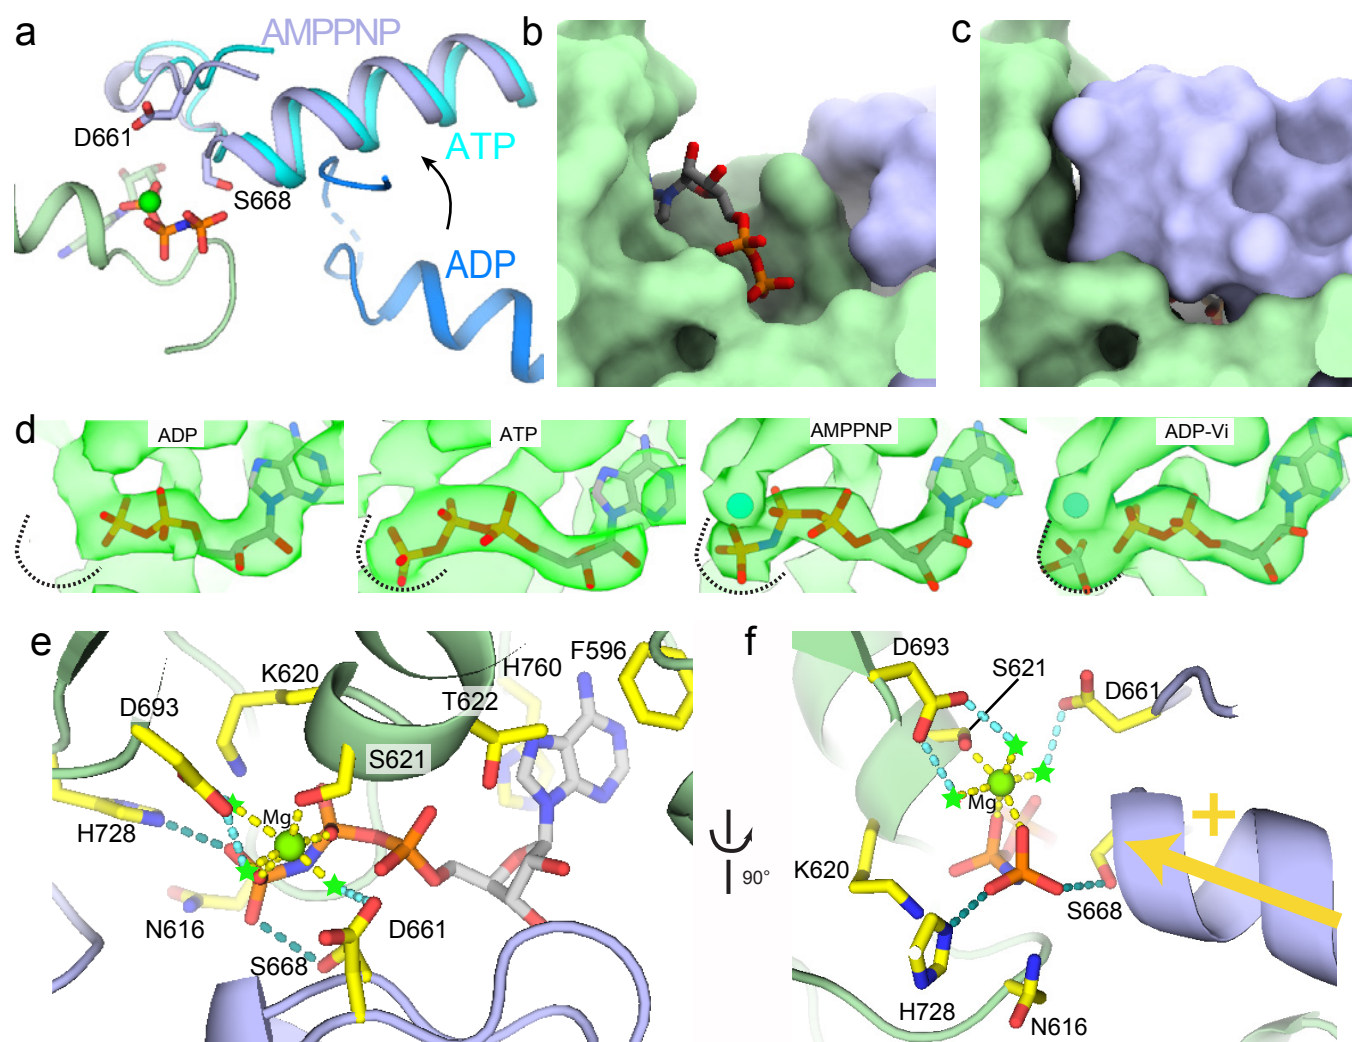

**Fig. 2 | Closing of the MutS dimer completes the ATPase active site.** **a**, Movement of the signature loop and helix of monomer B towards the nucleotide in monomer A. Monomer A in green, with AMPPNP and residues Asp661 and Ser668 shown as sticks. Monomer B in dark blue (ADP-bound), light blue (ATP-bound), and pale blue (AMPPNP-bound). **b**, Surface representation of nucleotide binding site of ADP<sub>2</sub>-bound MutS. Monomer A in green, monomer B in blue, and ADP molecule shown in sticks. **c**, Same representation for ATP:ADP-bound MutS. **d**, Close up of the cryo-EM maps at the nucleotide binding sites in ADP<sub>2</sub>-, ATP:ADP-, AMPPNP<sub>2</sub>-, and ADP-Vi<sub>2</sub>-bound state. The dashed curved line show the boundary of the electron density map in the ADP-Vi<sub>2</sub>-bound state. **e**, Close up of the composite ATP binding site showing the interactions with AMPPNP. Interacting residues are shown in yellow sticks and hydrogen bonds shown as dashed lines. Green stars mark predicted position of water molecules **f**, 90° rotation of the view shown in panel e.

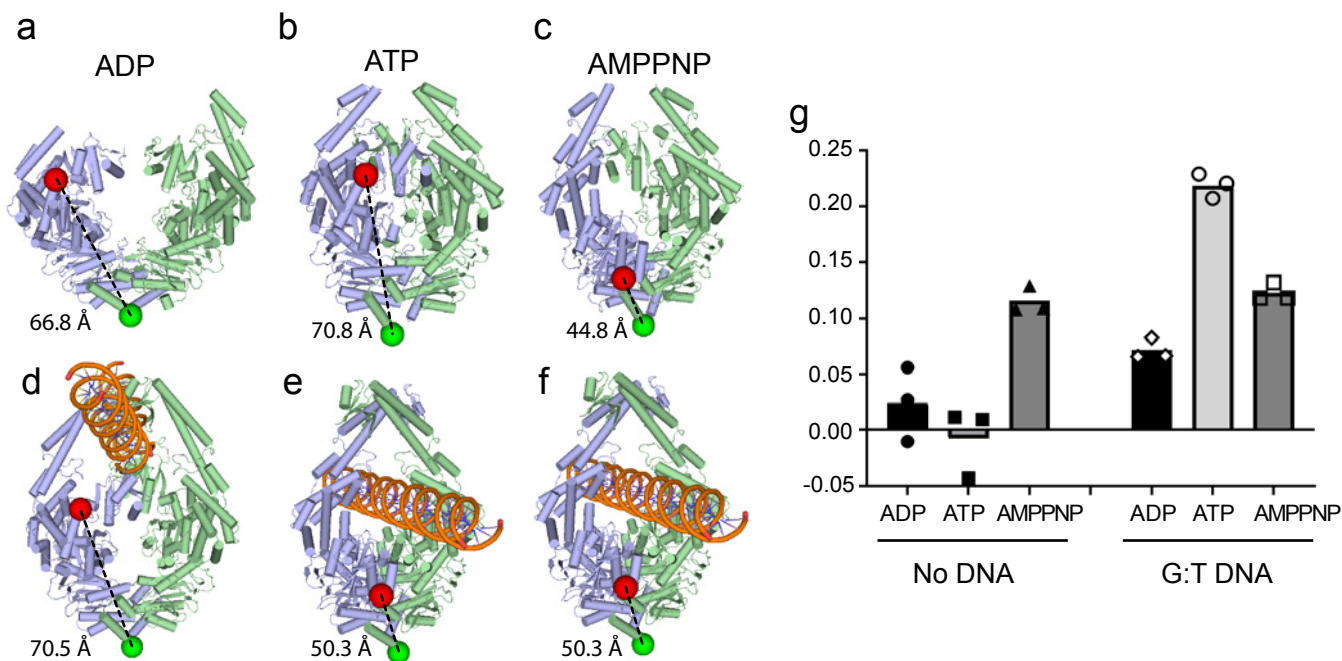

**Fig. 3 | Two ATPs are needed for the MutS clamp formation.** **a-c**, Structures of ADP<sub>2</sub>, ATP:ADP, and AMP-PNP<sub>2</sub>-bound MutS. Position of residues 246 and 798 are shown in red and green spheres, respectively. **d-f**, Structures of DNA-bound MutS in presence of ADP, ATP, and AMPPNP<sup>22</sup>. **g**, Förster Resonance Energy Transfer (FRET) values between fluorescently labeled residues 246 and 798 in the presence of different nucleotides and DNA. Higher FRET values indicate a closer distance.

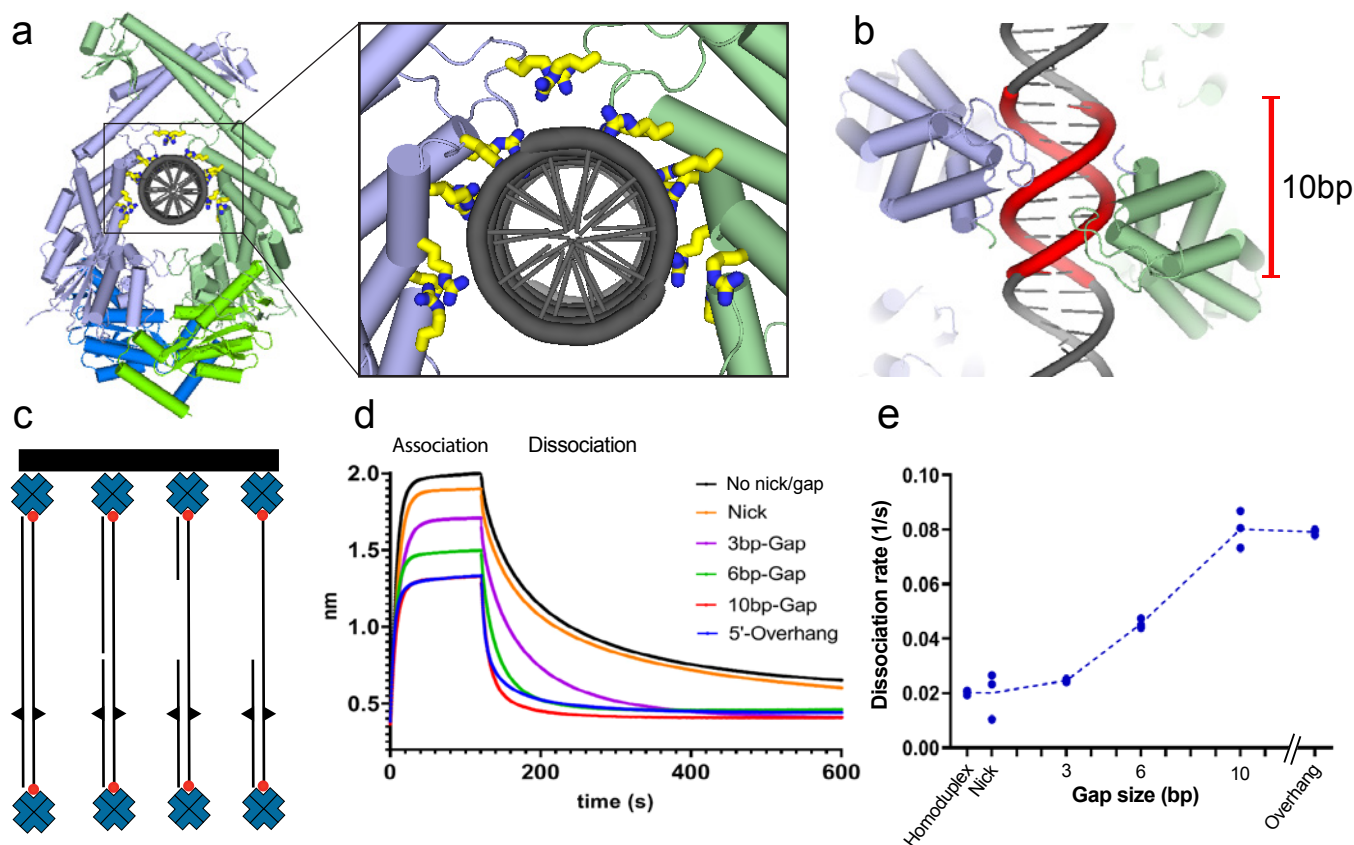

**Fig. 4 | Release of MutS from DNA at a single stranded gap.** **a**, Close-up of the protein-DNA interaction in the clamp state of MutS. Arginines and lysines that contact the DNA are shown in yellow sticks. **b**, Footprint of clamp-state MutS dimer on DNA covers 10 base pairs. **c**, Schematic representation of different DNA oligos used in the DNA release experiment. **d**, Association and dissociation of MutS on different DNA substrate in the presence of 2 mM ATP as measured by bio-layer interferometry. **e**, Dissociation rates derived from the binding curves shown in panel d. Dots mark rates calculated from three independent experiments.

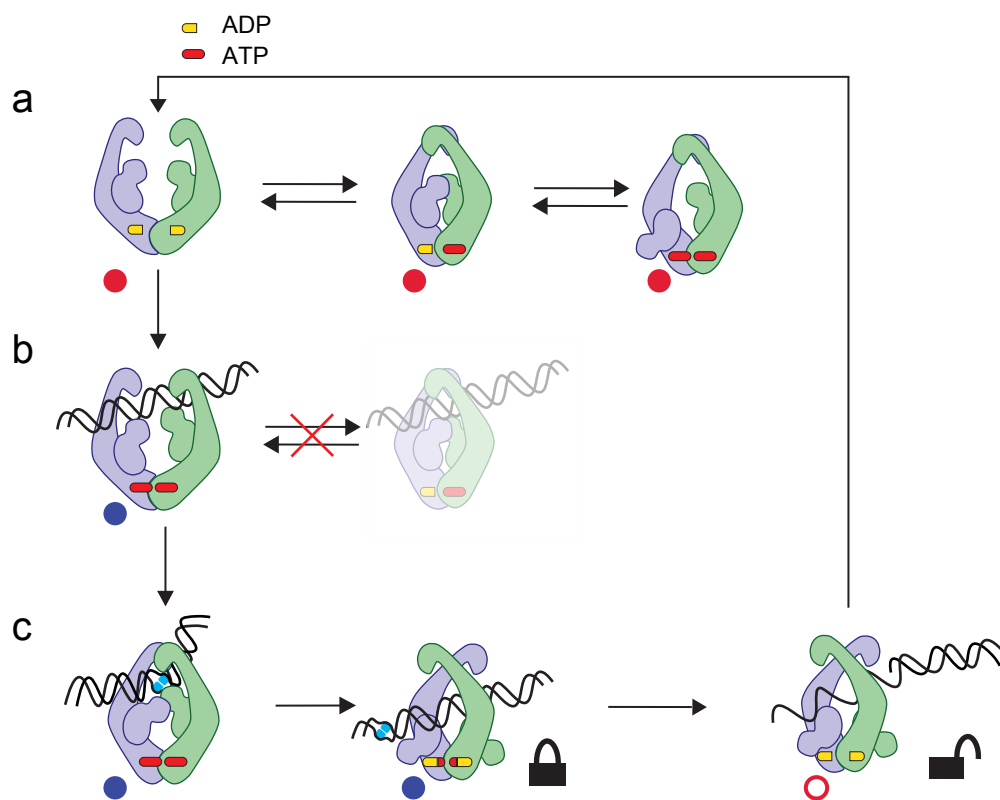

**Fig. 5 | ATP and DNA co-operate to create sequential steps of the repair cascade.** Cartoon style representation of the different steps of the DNA mismatch repair cascade derived from current and recent cryo-EM work. Red dots indicate structures presented in this work. Blue dots indicate cryo-EM structures presented in previous work<sup>22</sup>. Red circle indicate predicted structure based on data presented in Fig. 4. **a**, In absence of DNA, the two monomers can freely close and open upon ATP binding and hydrolysis. **b**, When bound to homoduplex DNA the MutS dimer can no longer close and is therefore not able to hydrolyse ATP (indicated with faded cartoon). The open form of MutS on DNA can freely exchange ADP for ATP. **c**, Upon mismatch binding, MutS transforms into a sliding clamp that can hydrolyse ATP but is locked by double stranded DNA. Only upon encountering single stranded DNA, MutS can dissociate from the DNA and return to the open, ADP-bound form that can re-bind a new DNA substrate.



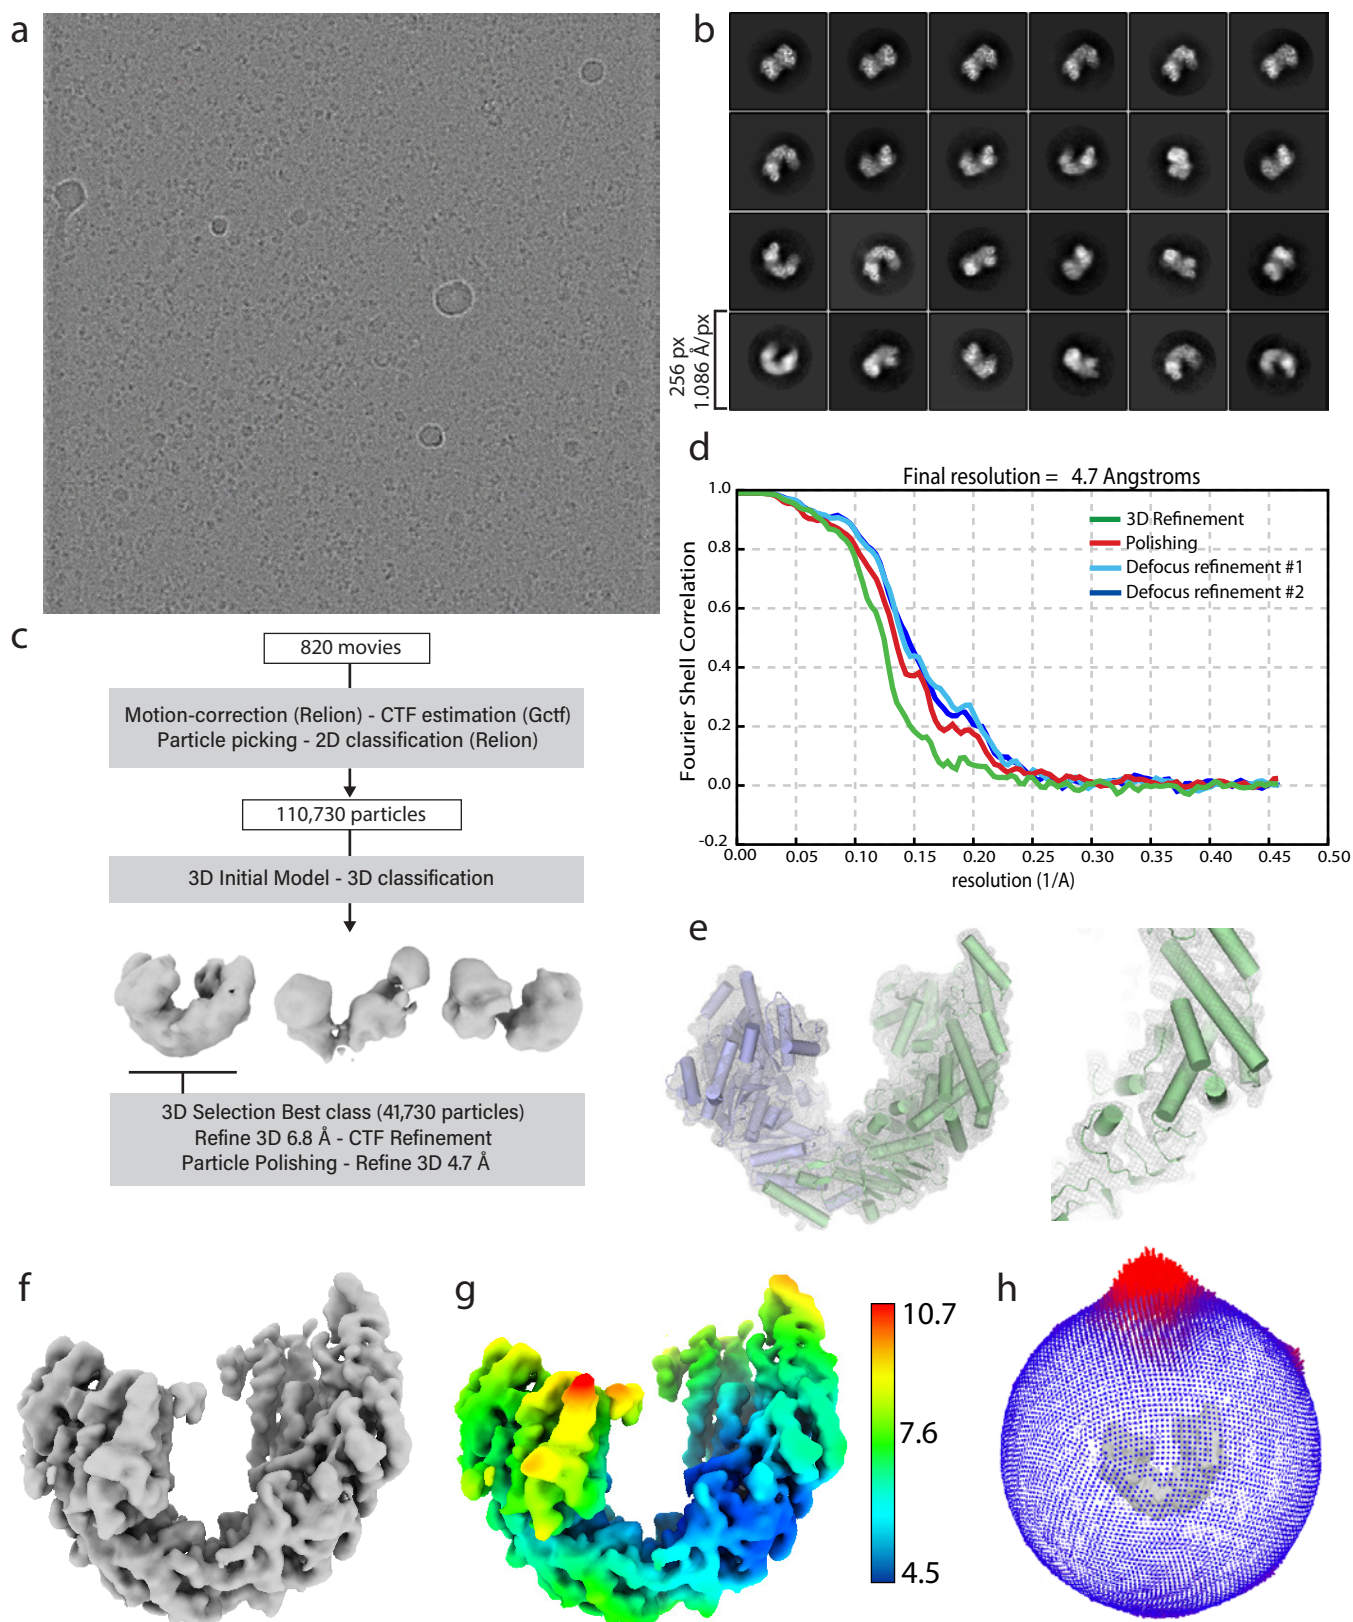

**Extended Data Fig. 1 | CryoEM data analysis of ADP bound MutS.** **a**, Representative micrograph. **b**, 2D class averages from full dataset. **c**, Schematic representation of main data processing procedures. See methods section for more details. **d**, Fourier Shell Correlation between half-maps from subsequent refinements in the processing procedures. **e**, Detail of model fit to map. **f**, Final map obtained applying SuperEM code to Relion post-processed map. **g**, final map colored by local resolution. **h**, Orientation distribution in final set of refined particles.

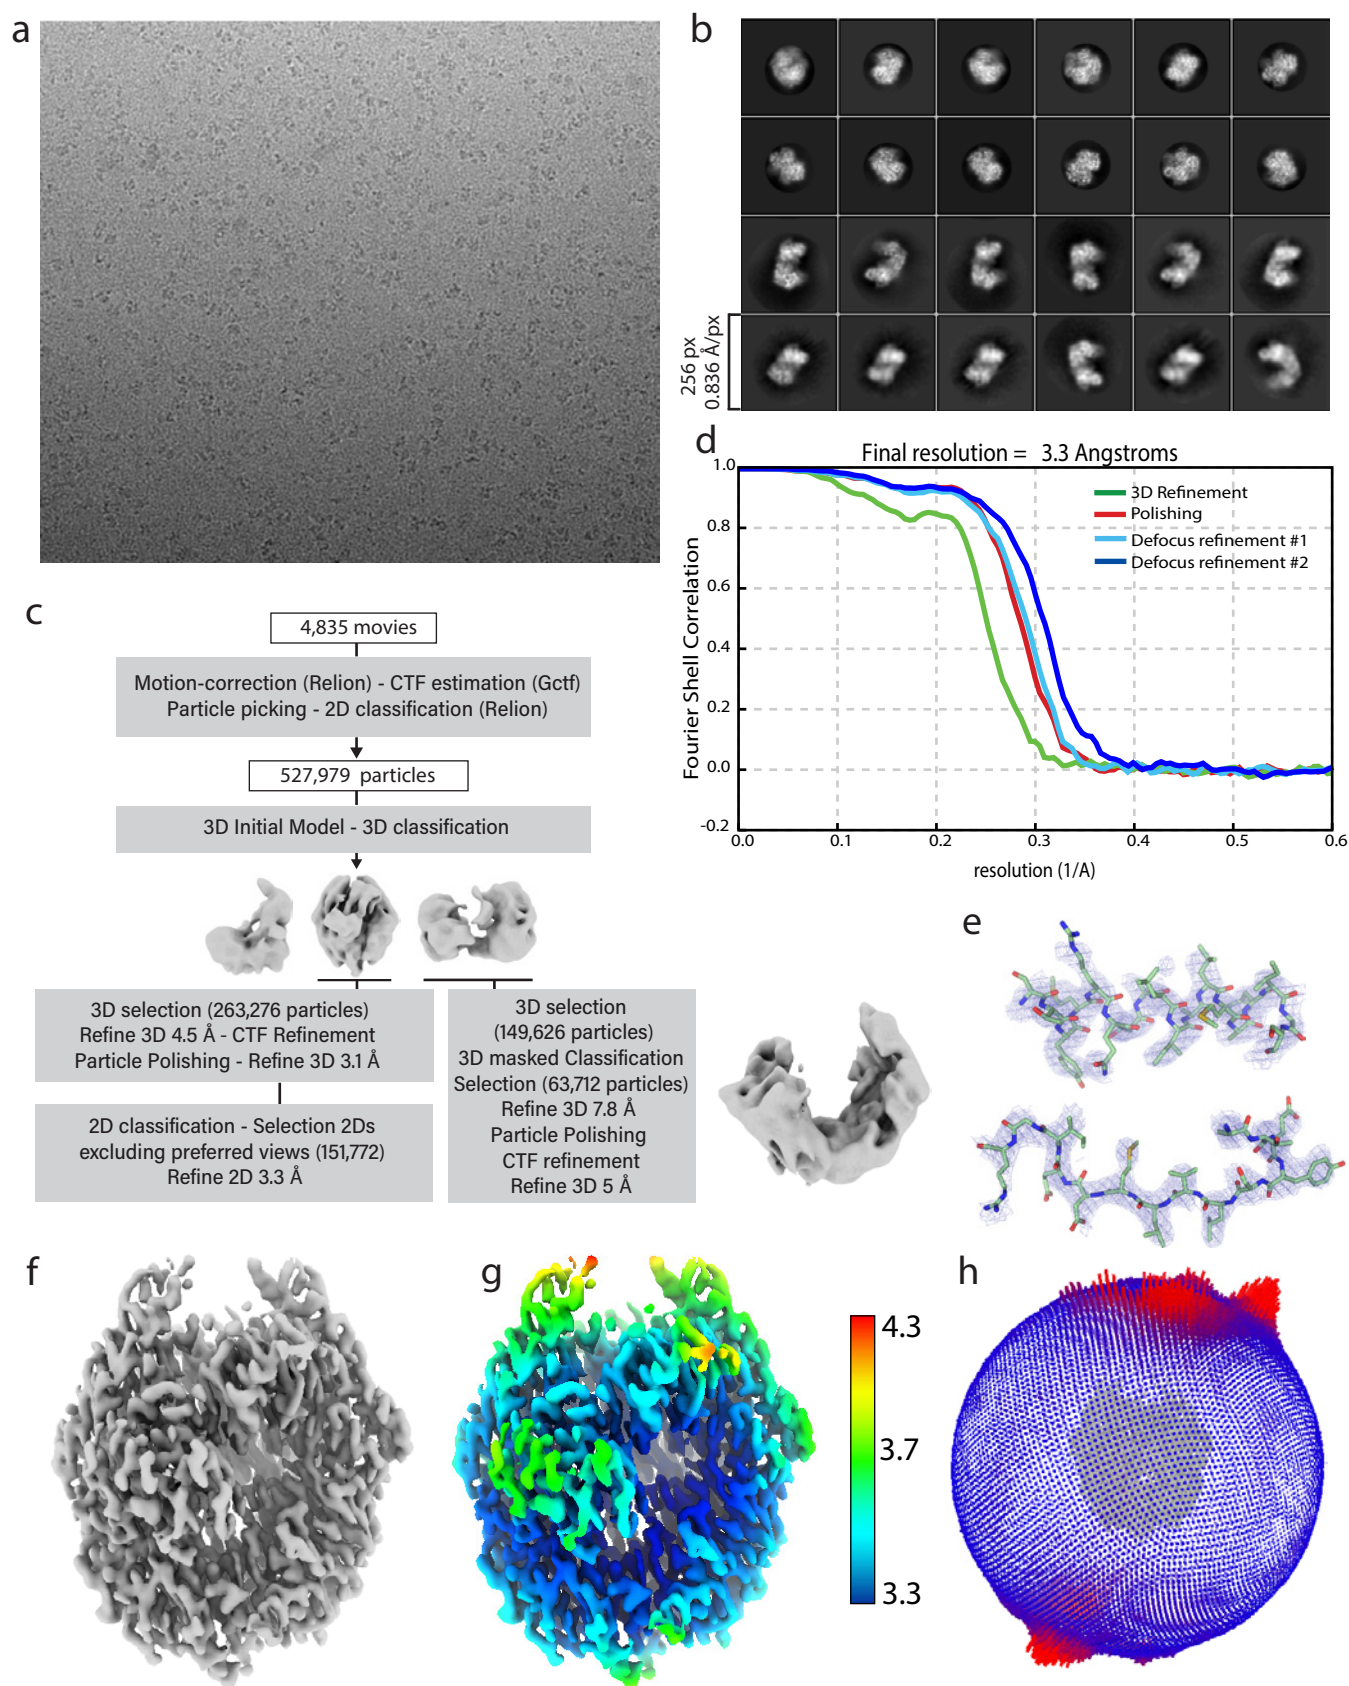

**Extended Data Fig. 2 | CryoEM data analysis of ADP-ATP bound MutS.** **a**, Representative micrograph. **b**, 2D class averages from full dataset. **c**, Schematic representation of main data processing procedures. See methods section for more details. **d**, Fourier Shell Correlation between half-maps from subsequent refinements in the processing procedures. **e**, Detail of model fit to map. **f**, Final map obtained applying SuperEM code to Relion post-processed map. **g**, final map colored by local resolution. **h**, Orientation distribution in final set of refined particles.

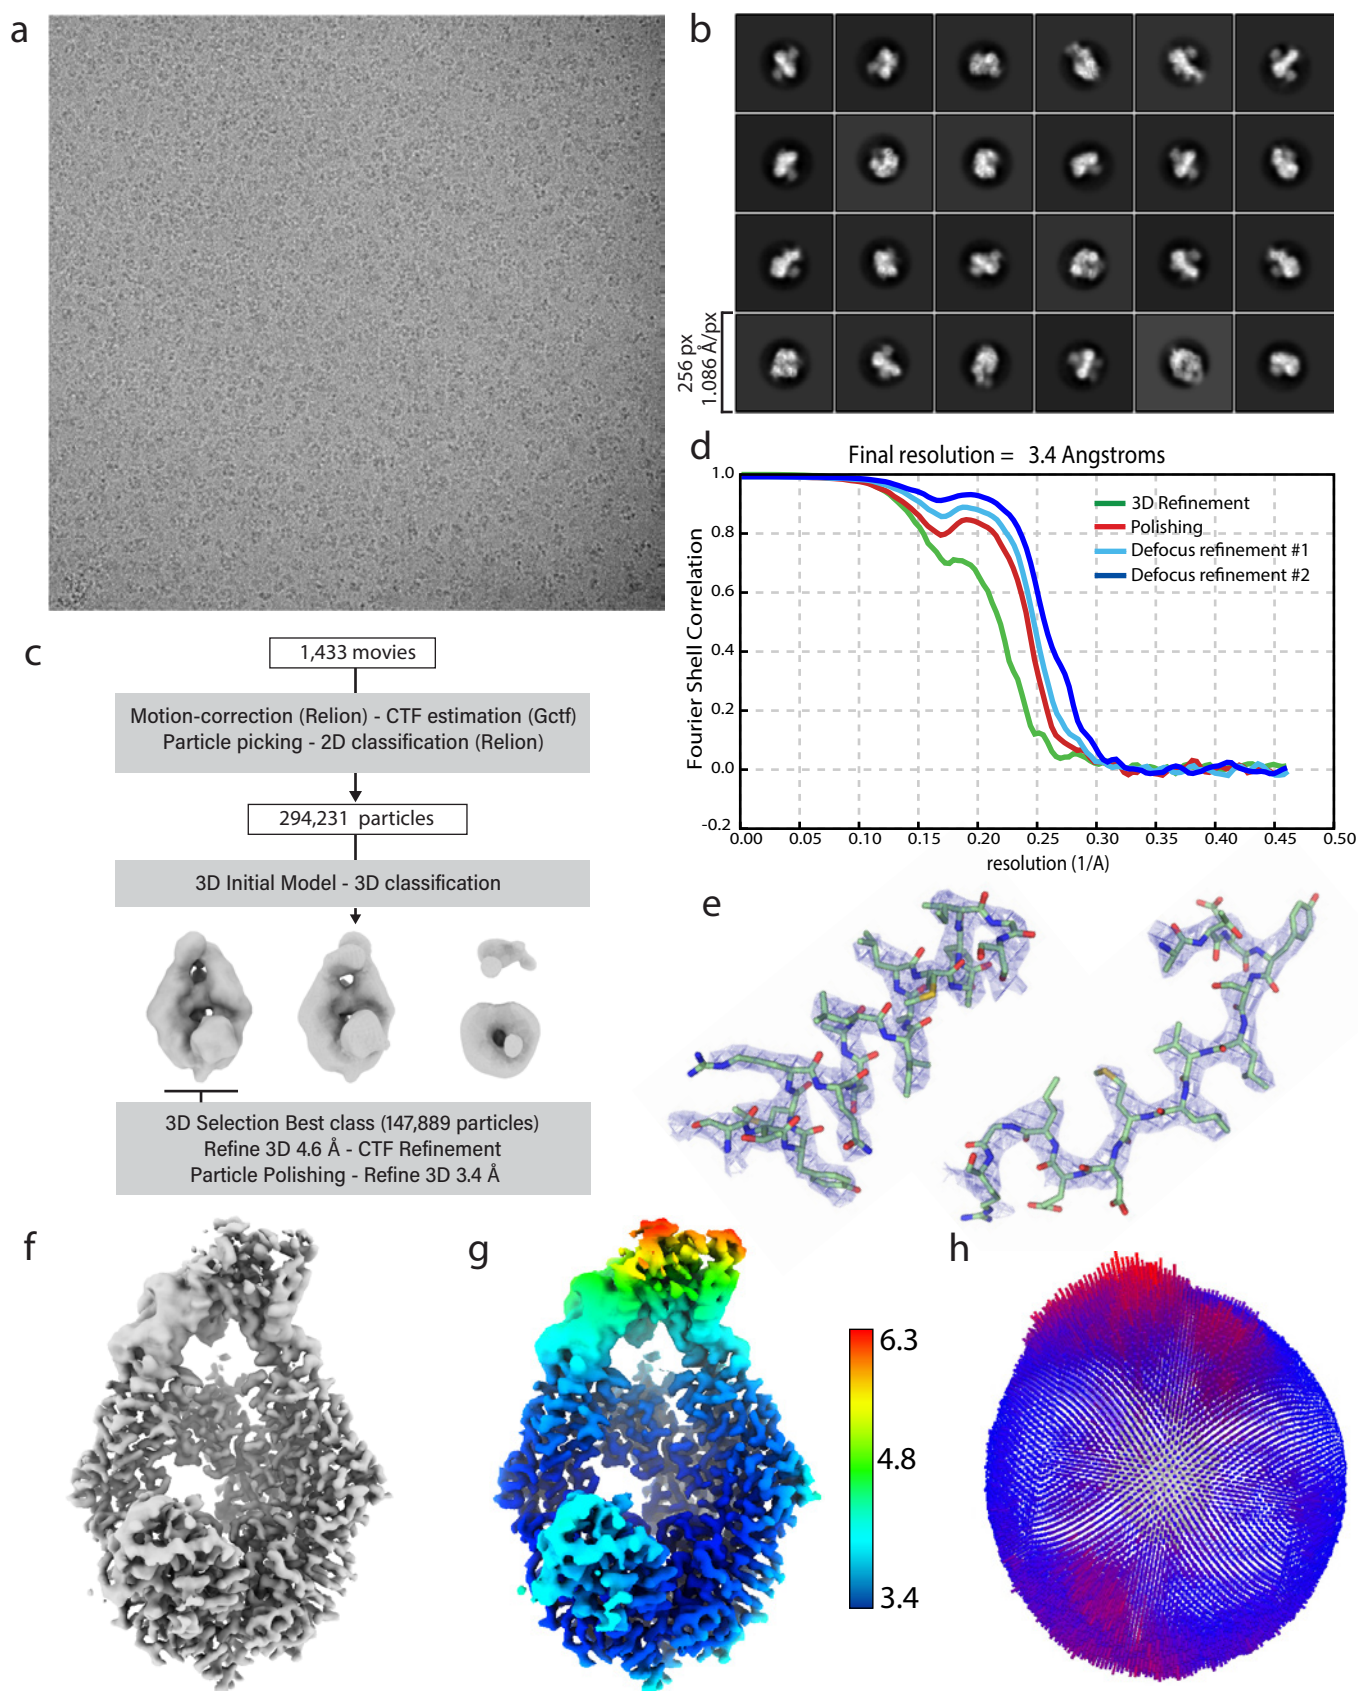

**Extended Data Fig. 3 | CryoEM data analysis of ANPPNP bound MutS.** **a**, Representative micrograph. **b**, 2D class averages from full dataset. **c**, Schematic representation of main data processing procedures. See methods section for more details. **d**, Fourier Shell Correlation between half-maps from subsequent refinements in the processing procedures. **e**, Detail of model fit to map. **f**, Final map obtained applying SuperEM code to Relion post-processed map. **g**, final map colored by local resolution. **h**, Orientation distribution in final set of refined particles.

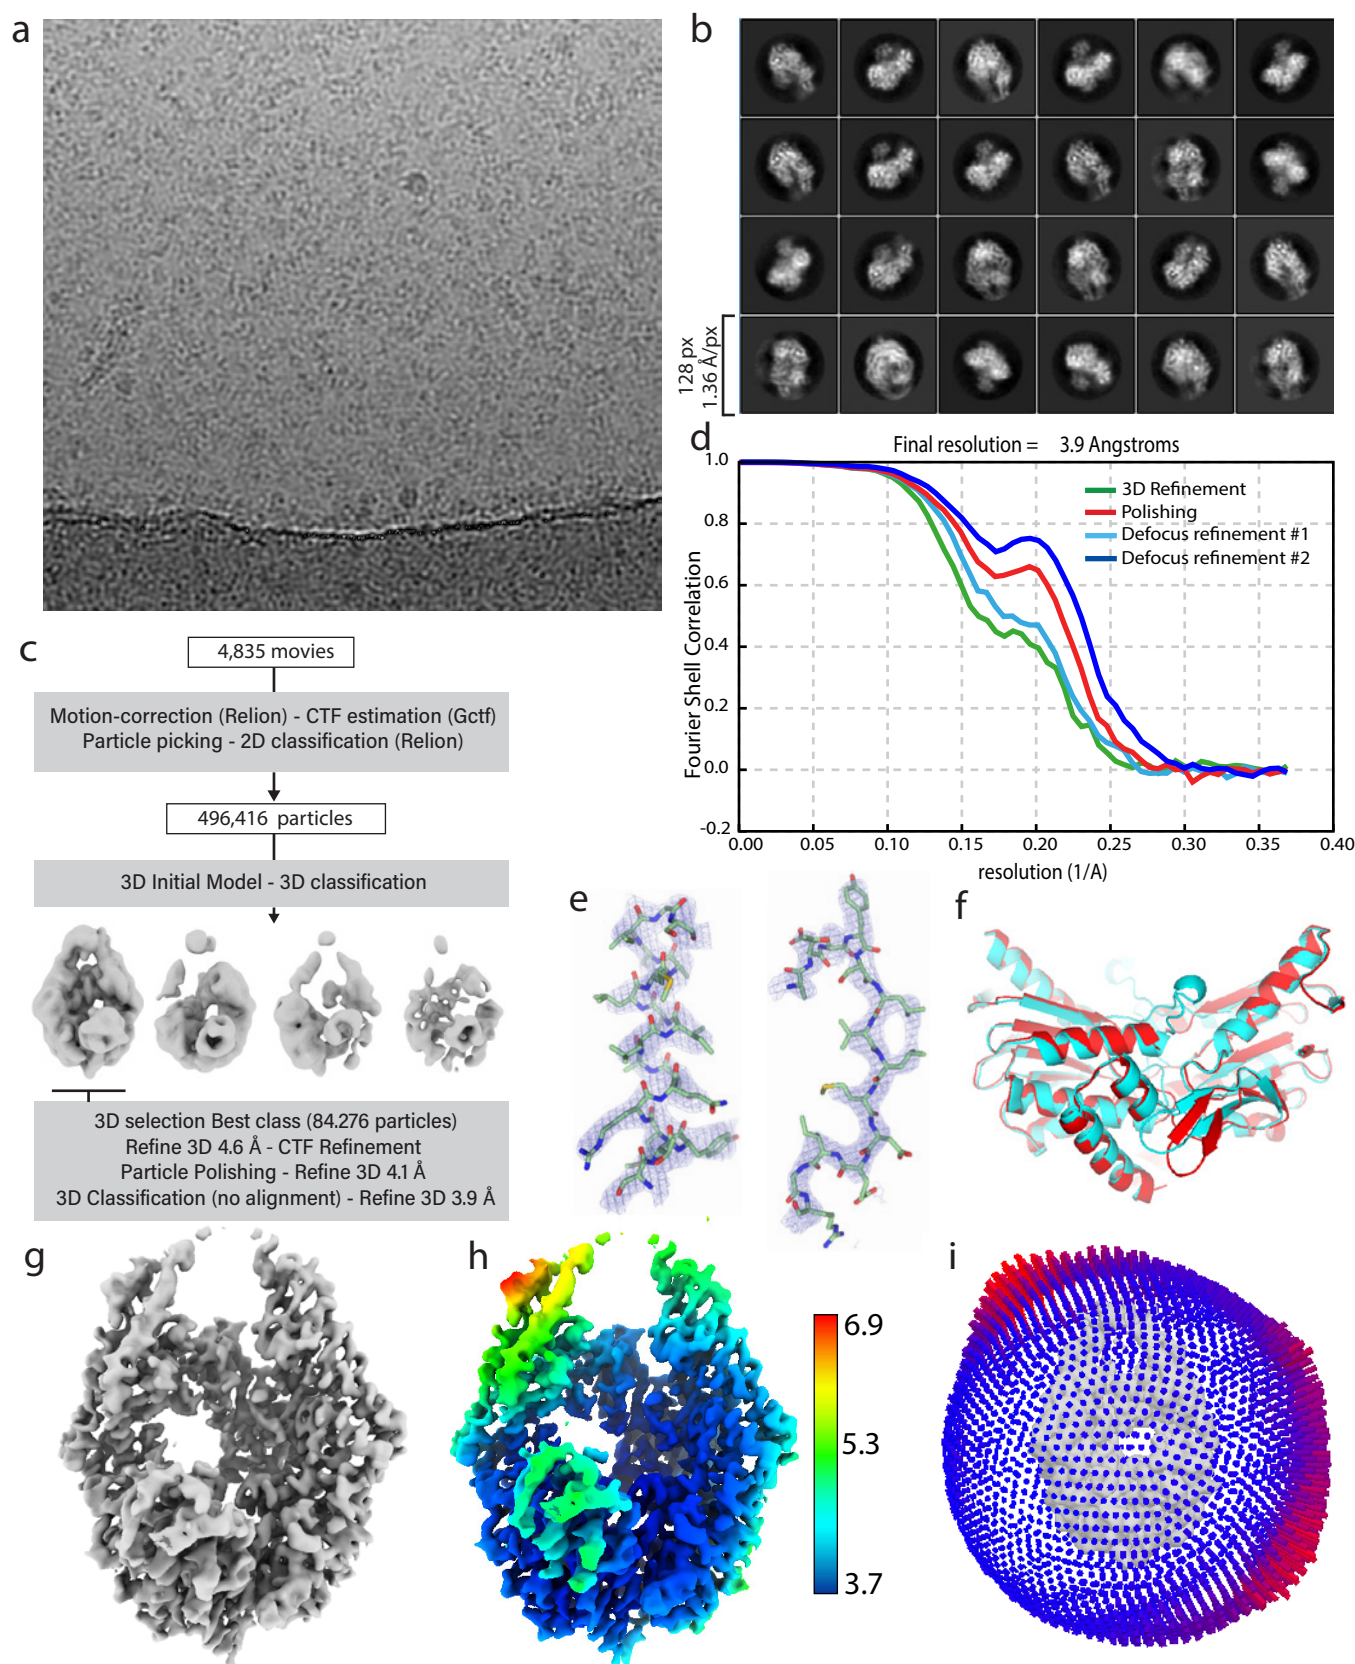

**Extended Data Fig. 4 | CryoEM data analysis of ADP-Vi bound MutS.** **a**, Representative micrograph. **b**, 2D class averages from full dataset. **c**, Schematic representation of main data processing procedures. See methods section for more details. **d**, Fourier Shell Correlation between half-maps from subsequent refinements in the processing procedures. **e**, Detail of model fit to map. **f**, Superimposition of nucleotide binding domains of MutS in ADP-Vi conformation and MutS in sliding clamp MutL bound conformation (Fernandez-Leiro 2021). **g** Final map obtained applying SuperEM code to Relion post-processed map. **h**, final map colored by local resolution. **i**, Orientation distribution in final set of refined particles.
